# Supplementary material
Source: PubMed Central journal article supplement (PMC3231844)

## Supplementary Figure legends

**Figure S1. LabChip 90 reading data of PCR assays.** One example of LabChip 90 reading data on a patient sample is shown here, which includes the HT DNA 12K ladder (A), 235 normal PCR assays (B) and 355 LR-PCR assays (C).

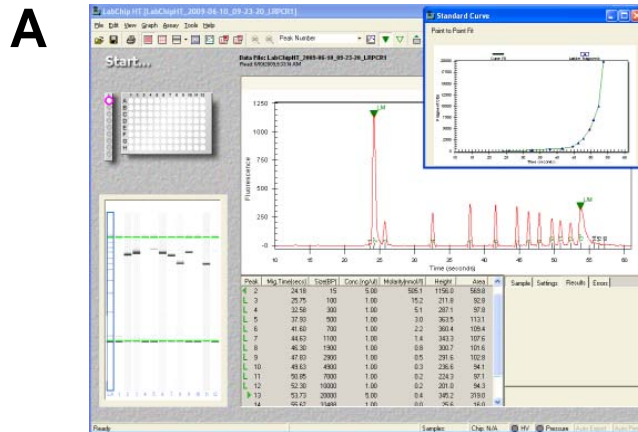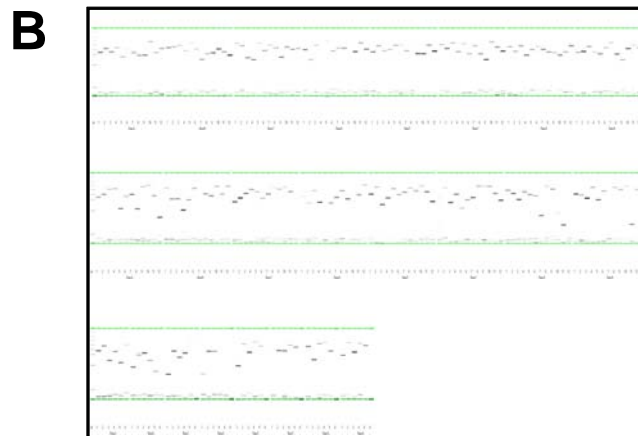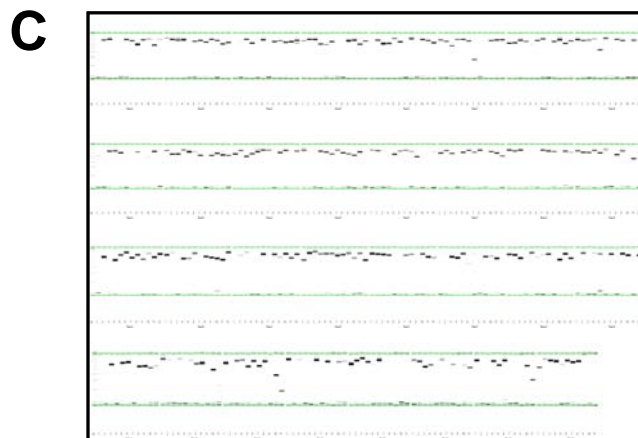

Supplement: 11-7978_z7g999112202sf01.pdf [file 11-7978_z7g999112202sf01.pdf]
