# Supplementary material
Source: PubMed Central journal article supplement (PMC3231844)
Supplement: 11-7978_z7g999112202st1.pdf [file 11-7978_z7g999112202st1.pdf]

**Table S1.** 605 pairs of PCR primers and their plate setup.

| Amplicon's Name | Amplicon Size (bp) | Forward Primer                     | Reverse Primer                  | PCR Condition |
|-----------------|--------------------|------------------------------------|---------------------------------|---------------|
| CFH_ex2-5       | 5099               | TCCATAGATATGGGGTTAGGAGAGAGAGAGA    | GCATGTGATTTAACTTCTTTGCACCAGTCT  | LR-PCR        |
| ABCA4_ex5-6     | 4922               | TTTAGATCTTGCCAAATATTTCCAGGAGGA     | GCCACATACCTAATGGTGAACCTCATAGTG  | LR-PCR        |
| ABCA4_ex36-38   | 5433               | GTGACAGCTTCAAGGTAGAGAAGAGGAACC     | GGCTCTGCTCGACCAACACATACTCTACTA  | LR-PCR        |
| BBS3_ex5-7      | 5100               | AAAGAATTCACACAGAGTGATCCTATTGAAA    | TGAACCCCAAGAACAGATACAGACTGAAA   | LR-PCR        |
| BBS7_ex15-18    | 5545               | CACAGGTGCAGGTATAGGTAAGTGTTCGAT     | TTATCTTTCTGCCAGCTTCTCTTACATGA   | LR-PCR        |
| CDH3_ex3-8      | 5156               | CCAGTCAGAGGACTCTTGTGTCAGTCTTGTTT   | GAGGTACACAAGCATTCACTGGGAAAAGAT  | LR-PCR        |
| CNGB1_ex26-29   | 4221               | TAGAGACACAACCATAACCCGATAGCATTTG    | CCACAGAATACCTGTGTGCTGGATCTTATC  | LR-PCR        |
| FIBL6_ex3-4     | 1746               | TGTGTGTTTTGGGTGAATTTCTAACTTATCCT   | TTGAACTGTGGCCTTGGAGTTATACCTTTT  | LR-PCR        |
| FIBL6_ex26-29   | 4066               | CCACCGGGATTTAGAGGCATTAACAT         | AAATCCACATGCATTTTTTACATCTTTTTT  | LR-PCR        |
| FIBL6_ex56-58   | 5546               | AAATTCAAATAGTTTTTACCACCCCAAT       | ATCTTACCTTAATGACCACAAATGGGCCAAA | LR-PCR        |
| FIBL6_ex87-89   | 1791               | CCCATGCTCTAGGCTAATCTCAGGAATTTT     | TTGAGAAATACACTCCAGTTTGGACCCTTT  | LR-PCR        |
| HPRP3_ex8-10    | 5449               | TGAGATTCTACACATTCTGTTTTCTATGACTCCA | TCAAACACAGAGATGTTAAAGTTCCTCCAG  | LR-PCR        |
| CFH_ex6-7       | 6020               | TGAATGTTACTGGTCACTATTTATTTCAAGAAGG | GCAACTTCGAAAACAAAGAATGCTTCCAA   | LR-PCR        |
| ABCA4_ex7-10    | 5322               | GAAACTATCTGTGATTGACAAGTGCAGCAA     | ACTGGTCTTGTGGCAGCTTTTACTTCTC    | LR-PCR        |
| ABCA4_ex39-43   | 4429               | AGGCACTGCTTGTAAAGTACTTCATGACCTC    | TTCTTCATTATCACAGGGGTTCTTAACCT   | LR-PCR        |
| BBS3_ex8-9      | 4110               | GTTAAAGCTCCTAACCCAGAGGGCAGATG      | AAAGGAAACAAAGGCTGAAGACACACAGTA  | LR-PCR        |
| BBS8_ex2-6      | 4727               | TCTTGTATTAGTTTTGACATGGCCCTTTA      | TTTTCCCACAGAACTGAGGGTGGATTTTA   | LR-PCR        |
| CDH3_ex9-11     | 3547               | CCTTCTGCCACCTTCTTATTCCTTTCTGA      | TAAAAGACTCCTCTGAAAGACCCCTTTGAC  | LR-PCR        |
| CNGB1_ex32-33   | 4563               | AAGGTACAACAGACAGTAAGACCCACCTCA     | AAATGTGTTAGACAAATCCTGAGGGGAAA   | LR-PCR        |
| FIBL6_ex5-6     | 2882               | GAAATTTGAACATGGGTAAACCAGCATT       | AATTGTAAGTGTATCGTGTGGCAATGATGA  | LR-PCR        |
| FIBL6_ex31-35   | 4903               | TTGAACCTAAATGACTCCCTGAAATGGAAT     | TAAATTTTCTGCAAAATCTGTCCAACAGGA  | LR-PCR        |
| FIBL6_ex59-64   | 4056               | GTTTTACTGTCCATGTTTTGATGCTGGAGA     | AAGTTCCAATGGGATGGAATTCGGTATTAT  | LR-PCR        |
| FIBL6_ex90-93   | 2198               | TTATCTTGGCATCAGGTAAGCCTTCTGAAT     | CTATATCCTTTTACCAGGAAGCCTGGAAGG  | LR-PCR        |
| HPRP3_ex11-14   | 2868               | ATGCATACCAATCTTCAACTTAATTGTGTG     | CACCATGCCTAGCTGCTTGCTGAATTTT    | LR-PCR        |
| CFH_ex10-11     | 2326               | TTTGAATGCTTATGGTTATCCAGGTTTTCA     | TTCAAACTCCCTTCTTTTCCCAGTTTATG   | LR-PCR        |
| ABCA4_ex12-14   | 3156               | ATCTGGACACGTTGAAAAATTAACACCAGA     | CTGTGATACAGTGGCTCCTTCAGGAGATT   | LR-PCR        |
| ABCA4_ex44-47   | 5093               | ATGCATTTCTGAAGCCAAATAGGAGAAGAG     | TCGACCACAGGAAATAGGCCAATATAGAG   | LR-PCR        |
| BBS10_ex2       | 2546               | TACTTAGAAAGACTGACCTCGGGTGAACCC     | CCCTAAACACATAGGCTAACACAGAGCTGA  | LR-PCR        |
| BBS8_ex8-9      | 4885               | TACATCTGCTTCCCTTTGATGAGTGTTTTT     | CTCTACTACCTGCCAAGTGGGATACAAAG   | LR-PCR        |
| CDH3_ex12-13    | 4692               | GAAGTGGCTGCAACTGTGTGTCATGATGTTA    | GCTCAAGGTAGAATCCAGTCTTTCAACTCC  | LR-PCR        |
| EFEMP1_ex1-3    | 5227               | CTTTTGTATGTAACAGCGTAGCAGGATGG      | AAGCAATGATGACAACTACAGCAACTACCC  | LR-PCR        |
| FIBL6_ex7-9     | 3130               | ATGTTGAGAACATCAGATCAGAGCCTCAGT     | CTATGACAATATAAGCTCCACAACGGCACA  | LR-PCR        |
| FIBL6_ex37-40   | 3699               | TTCCTATCTGGACACAGAGAAATGTGTGAT     | AGCTGCTATCCAGTCTGTTTTCAGAGTA    | LR-PCR        |
| FIBL6_ex65-68   | 2695               | TCGCTACTGTAGAATTTAGTGGTTGCTT       | AACATGCTTCAGATGAGAGTAAGCCAAGGT  | LR-PCR        |
| FIBL6_ex94-97   | 3096               | GAATACTGGCCCTCTTTTCTCCCATGTAAT     | ACAGCAACCCCACTGTGTAGTATGAAGAAG  | LR-PCR        |
| HPRP3_ex15-16   | 4149               | ACAGAAAAGAGAACACTTGGTCCAACACAT     | ATATGCACATAAGGGGAATAAAGGGCAAC   | LR-PCR        |

|                 |      |                                     |                                  |        |
|-----------------|------|-------------------------------------|----------------------------------|--------|
| CFH_ex12-15     | 3704 | GGAAAAGGATTTATCTGATGCCCTCTGTA       | ATTCACAGGGCACAGTTAATATTAGGAACA   | LR-PCR |
| ABCA4_ex15-17   | 5604 | CCTAGGATTAAGGAACCTCAGCACATGGAG      | AGGGCAATTTAGTCTACTGGACAAGGTGTA   | LR-PCR |
| ABCA4_ex48-50   | 5204 | CTTTCTTGTTGCCAGGCTTATCTTACATT       | TTGTTTTCTGCTGCAGTGGGGTCATTTAC    | LR-PCR |
| BBS11_ex2       | 2315 | TGTTTTGTCTGGTTTGTTCCTATCTGTC        | TGAGTCTATTCTGCATGTGCCACTAACAAC   | LR-PCR |
| BBS8_ex10       | 1944 | CTTGTTCCATGGGTCATCTCCTCTTTATTC      | TATTCTGTTCCACTGGATTGTTTGTCCATT   | LR-PCR |
| CDH3_ex14-16    | 3510 | CTAGGTGCAAGTAAAGCCATTGTAGCATGT      | GTGGAGAGGTTTTCACTGCTGAAGTCAAAC   | LR-PCR |
| EFEMP1_ex4-6    | 5477 | TTAGCTTAAGAAGTGGCAAAATGGAGGAAA      | CATACCTGGTCACTGGATAACACACTGAGA   | LR-PCR |
| FIBL6_ex12-14   | 3744 | TGGTGGTGAGAAACCTACAAATCTGCTAAC      | AAAGAGAATGTTTCAGCTGGATTAGCAAAGG  | LR-PCR |
| FIBL6_ex41-42   | 3468 | AATGTAACAGTGTGCTGGCCTGTTTTATC       | GTGGAAGACAAAGGGCACATTACTACTCAG   | LR-PCR |
| FIBL6_ex69-70   | 3906 | TGTTGGATTTTCAAGTTTTTCTAACGAGCA      | TAAGAATCAGATTTGCACCCTGTCTCAACC   | LR-PCR |
| FIBL6_ex98-100  | 2159 | TCTCTGGACTGTGATTCATGTACTTCTTGG      | ATCTCCTCATTCTCTCCCTTTTATGTGGTC   | LR-PCR |
| CRB1_ex3-4      | 3672 | TAATTCCTTGTAAACAGCTGCTCTGCCTTGT     | TCATGCTGAATTTTCATCTTTCCATTGATTT  | LR-PCR |
| CFH_ex16-19     | 5872 | CAGATTCCATTGGCAGAAAATTTGTGAGT       | AGATGCATGTCACCATGCCCACTATTT      | LR-PCR |
| ABCA4_ex18-20   | 4703 | TGAAACTCTCCAAGTCTGAAGCTCCTGTTA      | GGACAAAGGACTTTAAACATAGGGGAAACC   | LR-PCR |
| ARMS2_ex1-2     | 2303 | CACCTTTGTCAACACATTATGTCCCTGTA       | GCTTCACATTGATGCTGATGAGAAGCTC     | LR-PCR |
| BBS7_ex1-2      | 2547 | GAAGCCTCTGCCCTCCTGTTCTTGT           | GTCCCTTGGTATTCCAGTTTCTGTTCAAAT   | LR-PCR |
| BBS8_ex11-14    | 5690 | TCTCTCCTTCTCTGTTTCTTTCACAGCAC       | ACCAGAACTTGGTGGCAATATGATCTACA    | LR-PCR |
| CNGB1_ex3-7     | 3458 | CCACCTAGCTACTAGGGAGGAATGGAAAGT      | ATCCTAAATTGCTTTAGTGGTCCCAGGAAT   | LR-PCR |
| EFEMP1_ex7-9    | 4754 | CAGGAATAGGACAAGAAGCCAGATCTCTTT      | TGGCAGTGTTACCAAGAGGAATAAATGAAA   | LR-PCR |
| FIBL6_ex16-18   | 5190 | ATGGTTGGGCTTCTAAGTGTCTCTTTCAT       | ACTCAAGAAAATTAGGAATGTGGGCCAGGT   | LR-PCR |
| FIBL6_ex43-46   | 4921 | TGAAAAATTTATATCTGTTTACATGGGAAGTCTGC | CTTTGACATCTCCATGACTGTGTAATCAG    | LR-PCR |
| FIBL6_ex71-72   | 5054 | ATCATGCATGTAGTTGTTGGAAGGATTTCT      | ATAAAGGTGAACTAAATGATGGGCCATTTG   | LR-PCR |
| FIBL6_ex101-103 | 3618 | TGTTAAACATTTGGGATAAATTCAGGTTTCC     | TGTGTGGTGTATAGCAAGCACAGAGTAAGTG  | LR-PCR |
| CRB1_ex7-8      | 2706 | GTAACCTCAGAAGTCCAGAAAAGGCCAAA       | TAATAAATGGCAATGCGTAACATGCACATA   | LR-PCR |
| CFH_ex20-22     | 4232 | TGAAGAAGAAATTTAAAACATCAACGCTTGT     | AGCCACCGGTCTCAGCTTATAATTACATTT   | LR-PCR |
| ABCA4_ex21-24   | 3607 | TATTTCTGTAAGATCAGCTGCTGGAAGTGG      | GTTCTCTTTGCTCCCATTTAAATGCATCAC   | LR-PCR |
| BBS1_ex4-7      | 1736 | CTTTATTGGTGCAGGAATGAATGAATGTG       | TGGTTGGGTTTGTCTTATAGAATTTACCACTG | LR-PCR |
| BBS7_ex3-5      | 4797 | TCTCTTTTGGCTCTTGTCTTTTGGAGATT       | GGGGAAGATAAAGGTGATGGAAGAAGAAAA   | LR-PCR |
| BEST1_ex3-9     | 5485 | CATTCAAAGGATCAGGGTGTCTGAAACTG       | TATGTGGCCTTGGACAACCTTACTCTCTCTG  | LR-PCR |
| CNGB1_ex8-12    | 4024 | ATGAAACCAAAACCAGGTCCTTCTAAGTCT      | AAGGACACCAAGCAACCCCTTCTAATATGT   | LR-PCR |
| ELOVL4_ex1      | 431  | GCCTTGAGGAGCAGGAGAAGAC              | ATTCGGATCAGATTAACCAGTGCT         | LR-PCR |
| FIBL6_ex19-20   | 3733 | TCACACTCTTGGTAACATTTATGCTCATCG      | TCTGAGGTGCATCTATATGGTTTCTTGGAG   | LR-PCR |
| FIBL6_ex47-49   | 3892 | AAATTTTTACCGBAAATTGAGCATCACTTGG     | CCCTAGCACAAAACACTGTGCCTAGAACAT   | LR-PCR |
| FIBL6_ex73-77   | 4082 | GCCAGATTTACATACCCATATTAGGGATTT      | TTTTCTCTTCTATTCCCTAGAACCCCTTTC   | LR-PCR |
| FIBL6_ex104-105 | 4141 | TGTCAAAAGTTCACAACAGTTGAGGAGAAA      | GTAAGAAGGGGAAGCCACTAGGAGAATGAT   | LR-PCR |
| CRB1_ex9-10     | 4696 | TTATCAATGCTTTATTTGTGGGAGCAAATG      | CGACAGCAACCATATTTGCATCATGTATTA   | LR-PCR |
| BBS9_ex14-15    | 2523 | ATGCCAGTTTCTTTGTACCTTGTCTGGAG       | AGAGCATGCAGCTAAATAACCAATGACTTG   | LR-PCR |
| ABCA4_ex27-30   | 2954 | CAGCCTGGTATTTTCATTGCTGACTTAAATG     | GAAGTATCTGGTGGAAAATGAAGCTTTTGG   | LR-PCR |
| BBS1_ex8-11     | 4417 | CTTCCCTCATGTGGCATTCTGGGAGTAT        | AGCTAAGAAGCCCCAGAGGTGAGACGAG     | LR-PCR |
| BBS7_ex6-8      | 3220 | TGCAAGTTGTATTCGTAACCTAATTTTTAAAGCA  | TATTTCTTCTAATACAGGCAGCCCTTGAGT   | LR-PCR |

|                 |      |                                   |                                  |        |
|-----------------|------|-----------------------------------|----------------------------------|--------|
| BEST1_ex10-11   | 2311 | GTACAGGACAGATCAGGAGAGAGGTGAGAG    | GGATTCAGATAGAACTAAGGGTCCCGACT    | LR-PCR |
| CNGB1_ex18-20   | 4697 | TTACCTTTAGGCCAAGCCATTTAACAGATG    | TTGAGAATCAGGCAAGAACTGTGGAATAC    | LR-PCR |
| ELOVL4_ex2-4    | 5719 | CACTTGCAGGAGTCAGTATTGTTCTTTGG     | GTGTGTAATTTCCACCTGTGGTATCATGC    | LR-PCR |
| FIBL6_ex21-22   | 3530 | GCAGCTGATCTCTTCATTGTGTTCTAAAAGG   | TGACTGTTGACCAGTAGAAAAATTGAGATCC  | LR-PCR |
| FIBL6_ex50-52   | 3326 | CAGCATTCCCATTATTGCCCTTACTACATT    | GTTTTAGATTCTAGGAGCATTGGCATTGCT   | LR-PCR |
| FIBL6_ex78-81   | 4309 | AAGTACTGTGCTAGGCACTTCAGGGGATAC    | CCCCACACACACTTTGGATTACTGAGTTTA   | LR-PCR |
| FIBL6_ex106-107 | 2339 | ATCCCCATTTTGTGGTTAAAGAAGGTTAGG    | GATATGACCATGGTGGGATCATGAAAATAC   | LR-PCR |
| GUCY2D_ex4-8    | 4138 | TAGAAGCCAACCAAAAGATAGGTGAGAAGG    | CAAGATCAAAGGAAAGAAGTGTGGTGTGG    | LR-PCR |
| ABCA4_ex2-4     | 4913 | AGATACCACAACCAAGTCTACTGCACAC      | GCTTCTAGCCCTTGACCTAGCCTCATACTT   | LR-PCR |
| ABCA4_ex31-35   | 4237 | AATTTTTGGAAGACAACAAGCAGTTTCACA    | TGAAAGGTTTACTGAACTTTGCCAGTTCCT   | LR-PCR |
| BBS1_ex12-15    | 5002 | GCTTTCCTCTCCAAGATATTTCCCAACT      | CCCTGGCCTTTCCCACTCCATATCTAAG     | LR-PCR |
| BBS7_ex9-12     | 5372 | ACTGAAGTTTCTGCCATTTGTTCAAGATA     | GAAGGAATCTAGGACATCAGGTTTCTCGAC   | LR-PCR |
| CDH3_ex1-2      | 851  | CCCTGTAAAGAACAGCTCCAGAAA          | GACAAGGGGCTGGATGTCATAG           | LR-PCR |
| CNGB1_ex21-24   | 5314 | CAAAAGTGCCACATGTAGTAGTTGAAGGAG    | ACCTTACACCTGTTCCCATTTCTGTTAGAGC  | LR-PCR |
| ELOVL4_ex5-6    | 3272 | TCATTTATTGTACATCTCAGTGGCTTACTGC   | GTCACCTAATGATTGCTTTGGTCTGGAGAA   | LR-PCR |
| FIBL6_ex23-25   | 4939 | GATGTACATTGCAGATGGGAAAATGGTTTA    | GCTGGCCCTAGAATTACCAGTTGAGAGTAG   | LR-PCR |
| FIBL6_ex53-55   | 3850 | TCGTAAAAATGTAACTGTAACAGCAGCAAT    | TACCTCCTTGGGAGAAGTATCAGTTTCTGG   | LR-PCR |
| FIBL6_ex82-85   | 5499 | TGCTAGCACCAAAAATACTGATTTCTTTCA    | ATGATAAGGAACAAGGCAGCCACATTATCT   | LR-PCR |
| HPRP3_ex2-4     | 4522 | TGATGTACTAACCATTTCCCTGGATCACTT    | CCCCAAATGCTAAACACTAATTCAAATCAA   | LR-PCR |
| GUCY2D_ex9-19   | 4736 | CCGTACATACCTTATCAACCATTTTCAATCA   | CAGATCTACTGAACCAAAATTCCTGCAATG   | LR-PCR |
| USH3A_ex5-6     | 1709 | GATAATGTCAATGGGGATGATGGTAAGAGA    | TAGCGAATTGACACCAGAGCAAGTTATTTT   | LR-PCR |
| TLR4_ex1-3      | 4485 | TTAGCCGAGAAGTCTTTGAATACACCAAT     | TCCAGTCCAATAATGAAATGACAGGACAAT   | LR-PCR |
| SAG_ex10-11     | 4139 | AGTTGCTTGAAGAAATATCCTCCTGTTGCT    | GTAATCCTTGGTAGAAGCTATGGGCCTTTC   | LR-PCR |
| PRPF31_ex1-4    | 4822 | GAGACTCGCCAGTGAACAAAACAACTAAA     | CACTTAGACGTCTCTCTGCCCAAATCT      | LR-PCR |
| MERTK_ex3-4     | 3077 | ACTCAAAGGCTGCTGCTTTAAATGCTAGTG    | GCCACTTCAACAACCTAACCCATGTACCC    | LR-PCR |
| MASS1_ex7-9     | 2831 | CTAAACAAGCCTTTCTATTTGCTCCCTCAG    | CAATTCAAAGCATGGTTAGCCTCTCTTTCT   | LR-PCR |
| MASS1_ex35-39   | 5609 | TAAAAGTTTGTGTTTCCCATTTTAGCATGT    | AAAACAGCACAATGATCACTTCTGATTCAA   | LR-PCR |
| MASS1_ex68-70   | 3577 | AACAAGTTTATGAAACAGGAATTTGATGGA    | TCCAGTAGTTACTAAACATTTTCGAGGGCATT | LR-PCR |
| RLBP1_ex1-4     | 4330 | TGAAAGTTTGAGATCCACAGTTCTGAGACA    | AGGGATACCCAGGAAGAGCCATGTATTATT   | LR-PCR |
| PRPF8_ex1-2     | 1487 | TGGTGCCTCACTAATCCATCTGA           | TCAAAGCATCAATCCAAGACTGTG         | LR-PCR |
| RPGR_ex8-9      | 3840 | TCCCCAGAGGCACTTAACCTTCACTATAAA    | CAACACATTTTCTGAATGGCATAATGTCTG   | LR-PCR |
| BBS5_ex9-12     | 5589 | CGTATTATGCTCTAAAATAAGGACAAATTGAGC | AAAGCACACGTAGATCACCAGTCCCTTTTG   | LR-PCR |
| USH1G_ex1-3     | 5247 | CTCCAACCTCATGCCTCAGCCCTAATAC      | CAAGGTGCAGACAGACTTTCAAAGGAGT     | LR-PCR |
| TLR4_ex4        | 2582 | CTCAGTCTGTGGGGCTTCTATTTGCTTAT     | TGCATATCTAGTGCACCATGGAATTACTCA   | LR-PCR |
| SAG_ex12-13     | 2303 | AATGAAGTTGAACATTAAGGGATGGGAAGA    | CATTATGATAAAACCTCACGAGATTGTCC    | LR-PCR |
| PRPF31_ex5-10   | 5445 | CTGACTGTCCAGTGTCCCTAAGAAGAGA      | GGGATGTCCAGGAACAGAACAGGTTTAAAT   | LR-PCR |
| MERTK_ex5-6     | 3431 | GGTTTGTCTCCATAGCTAGCACACCTTT      | CTGAATCCTGCACAGGAAGGACACAGTAT    | LR-PCR |
| MASS1_ex10-11   | 3285 | TTAGGCAGACCTTTGGGAATAATAACAAT     | CACAATGAAAAGCAGGGTAAAAATCACTG    | LR-PCR |
| MASS1_ex40-42   | 1832 | GTGGCTCTTGTAGCCAAAAGTGTCTTAT      | AACATACACAGTGTAGAGGCACTGTTACAC   | LR-PCR |
| MASS1_ex71-73   | 5290 | CATCTTCCACTCCTTATCTCACACCTTACA    | GTGTTTGTCTCAAGGAGAATAACCCCTGTG   | LR-PCR |

|                |      |                                 |                                 |        |
|----------------|------|---------------------------------|---------------------------------|--------|
| RLBP1_ex5-7    | 2071 | AAGAGTACTGGGATAAACCTTCTGGCCTCT  | AAAGCTTCAAGGGCAGGTGGAAATATAACT  | LR-PCR |
| PRPF8_ex3-7    | 2827 | TGACAGACATGAGACAACCTGGTGATAGTGA | TTAGCTCCTGCTGAACTAGGCACAGACTTA  | LR-PCR |
| RPGR_ex10-11   | 2104 | AGCCAGTCTGTCTAGGAAGCCTACCACTAA  | AGTGATGTTAGGCTCTAACCAGGGAGAGAA  | LR-PCR |
| BBS6_ex3       | 1912 | GCTGGGATATCTTTTCATAGGTGTCCATCTT | CGGTCAATTCAACAAACACTTTAGAACCACC | LR-PCR |
| USH1C_ex2-4    | 2731 | ATGACCTCTCCTCCCTGAGGTCTGCTAT    | AAATTGAAGCACAGGGTTAAGTCATTCCAC  | LR-PCR |
| SEMA4A_ex2-6   | 4898 | GTGTCAACAGATCTGAAAGTGACAGGAGAG  | AGCATCCTTCAACTTCAGCTTCCAAATAAC  | LR-PCR |
| SAG_ex14-15    | 1692 | TGAACTGCATGTATCTAGGCCATTATCTCTC | CTTCTCTGATTCTGCTTACCCCAGGTG     | LR-PCR |
| PRPF31_ex11-13 | 2895 | TAAGGAAGGAATGGCCTCCCAACTCTGA    | ATGATGAAGACCTGCTCTAGCCCATACTG   | LR-PCR |
| MERTK_ex9-10   | 3672 | GTTACATCCTGTCCCTACCTGACTTTTGGT  | AGCAATCCAGTTTGAGTAGCAAAGGCCTAC  | LR-PCR |
| MASS1_ex12-17  | 5431 | GGTCTAATTCCTCATAGCCTTCCTTTTCATT | GGTTCAACACATACATTCTTACCCCATT    | LR-PCR |
| MASS1_ex43-45  | 4985 | AGGAAGCTGCCTTTTATCCCAAGATTACTG  | ATGAGCGCCCAGCCTCAACACATATTTA    | LR-PCR |
| MASS1_ex74-75  | 5841 | TTTGCACTCCTGTTCTTACATTTCTTTTG   | AGAAGTAGAGCATCTGAAGACGTGCCAAAT  | LR-PCR |
| CA7_ex3-7      | 3533 | AGGAGGTTGAGGCTATCATAAGCCATGTTT  | GCCCACCTCTAATTATTGCTTGAGTCTCTC  | LR-PCR |
| PRPF8_ex8-19   | 4919 | GGTCAGCCAGTTGAGGTGTGAGAAGTGAC   | AAGCACTCCACACACAATTCCATGCTACT   | LR-PCR |
| RPGR_ex12-14   | 3831 | TCAATTTCCCTGACATGAGGTTAAAGGACT  | CCTCTTTTTGTAAACCCTCTCCATCAGTGT  | LR-PCR |
| BBS6_ex4-6     | 4140 | TTGAGGGTTTTCTGAATTCCTTGAAAATGT  | CAATGTACAGCAGCCAGTATAGAATCCCTA  | LR-PCR |
| USH1C_ex5-12   | 5068 | GGTTGGTTGAGATCAAGGCTTATTCCAG    | CCAGGGCTATTGTGGGAATTAAGAAACATA  | LR-PCR |
| SEMA4A_ex7-10  | 3339 | GGGAGAGAGAAACCATGTATCAATGCACTA  | GTATAAAAGGGTGCTAGGCACATGTGGAAT  | LR-PCR |
| RS1_ex4-5      | 3233 | TTTTGTTATTTTCAGTCACCTGGTGCTTGTT | AACTGCATGCTGATATGGAAACTCAGACAA  | LR-PCR |
| PDE6A_ex2-4    | 4282 | AGAAAGCCTTCTCTAACCCCTCCTTCTCCAG | GAAATTTCTTTATCACTGGCCTTCATCACC  | LR-PCR |
| MERTK_ex11-13  | 3425 | AAGCTTTTGTGTAGAAAGAGCCCATTGAAA  | GATAGCAACTCTTCATATGCCTTGACCAAA  | LR-PCR |
| MASS1_ex18-20  | 2761 | TCTTTGGAAATATGGAGCAGTATTTTGCATT | CACACATCTCTGCTAGGGTTTATTCCAG    | LR-PCR |
| MASS1_ex46-50  | 5294 | GCAGAGCTTTAACAAATTTTCTTGGTTTTT  | AAAAATACCCAGTGTCTGGCAATGTGATAC  | LR-PCR |
| MASS1_ex80-82  | 2939 | AGGTTACTAGGAGGATCAAGCAAGAGGATG  | TTGCATCTTGCATACGTAAGGATTATGG    | LR-PCR |
| BBS12_ex1      | 2454 | GTACCTCAAAGCAGGGGAGCATATCTTGTT  | ATTCTGTAGCATCCCACGAAACAGTAACAG  | LR-PCR |
| PRPF8_ex20-23  | 2140 | GTAGAATTTGCTGAGGGGAGAACAAAAGAG  | CTCAGATTTTTCTTTCTCAATTCCGGTTG   | LR-PCR |
| RPGR_ex16-18   | 3707 | AGTGGCATGCGTAAAATCCTTGTTAATACA  | GGTTTTGGGGCCATGAAAACCTCATATTAAG | LR-PCR |
| CNGA1_ex1-3    | 3320 | AGCAGCATGAGGACAGACTAATACATAGGG  | ATACAAGCCTCCATCTCAGAAACTGTCTCC  | LR-PCR |
| USH1C_ex13-16  | 5421 | AGACTTTGTTAGATAACGTCCCCAAAACC   | GTTGATAGGACAAGGAATGTTTGGGAAAAG  | LR-PCR |
| SEMA4A_ex11-15 | 4772 | AACAGTTAACATTTGCTGAGTGCTTGCTTC  | GAAGGATCCTCTCCAGTTCTTCAATATCA   | LR-PCR |
| RP9_ex2-5      | 4531 | CTTTAGGAGCCTGAGAGTTGCTCTTTGAGT  | CCATGTTTACTGCACCATTCTCTAACACT   | LR-PCR |
| PDE6A_ex7-8    | 4665 | CTGTCTCTTTTCTCAGATGGTGAAACTTGG  | AGGAGATGATAGGGAACAGCATAAGCAAAG  | LR-PCR |
| MERTK_ex14-15  | 2521 | TTTCATCTCTTCTGACCTGGGTTTTAGAG   | GTCTACCGTTTGCCACAAAACATAACAGG   | LR-PCR |
| MASS1_ex22-25  | 4175 | CTTAGCAGTCAAAGTTTATCTGGGGGAATG  | CCTCATAGCGAAAGCATATCAATGTGAAAC  | LR-PCR |
| MASS1_ex53-55  | 4945 | ATTAGGTAATTTTCAGGGAACCCCTTGTGAC | AATTCAGTGCTTCAAATTCATTCAAACAA   | LR-PCR |
| MASS1_ex88-89  | 3682 | ATAGCAGCATGAGAATGGACCAATACAACC  | TTTAGGTTGTCTTACATTTGGTGCCAAGAA  | LR-PCR |
| FZD4_ex2       | 1601 | AGTAAACAGACAGACTCCCGATAGGTTGGT  | GGGGGTCACTTAATTGTTGCTAGTTTGTT   | LR-PCR |
| PRPF8_ex24-33  | 4779 | TCTGCCTCCTGGGTTCAATTTCTGTATT    | AAAAGAGTATGCGTTGCCTTTGGAAAAAT   | LR-PCR |
| OAT_ex1-3      | 4240 | GGCATAAGCCAAGGATTCTCACTCTTAATG  | ACACAAACCCTCCACCAGTGAGACTATCTA  | LR-PCR |
| CNGA1_ex6-7    | 3289 | AGGGTTAATCTCTCCCTAAGCATTGGTG    | TGTTCTAACTCCCGTTAGTGTCCAAATTCA  | LR-PCR |

|                |      |                                 |                                   |        |
|----------------|------|---------------------------------|-----------------------------------|--------|
| USH1C_ex17-19  | 3023 | GTGTGCTGTGCTGTCGACACTATTTCTAAC  | ATGAATATCAAATGGACACACCGTTGCTTA    | LR-PCR |
| SAG_ex2-4      | 5002 | CTTAGCTTAGCATTCTTTGGCCCTTAGACC  | GGTGTCTTCAAAGGCTAAGAGGCTATTTT     | LR-PCR |
| RP2_ex4-5      | 2800 | TGAGAACCAGAAAAGCCAGACTATTTACAA  | CATATGCAGAGAAAACAAAAGCTGCAAGCTTAT | LR-PCR |
| PDE6A_ex9-13   | 4829 | ACTGCCTCCCATATCTGAAAGAGAAACACT  | TTCTTGGAATCCTTTTACACTAAGCCCCTA    | LR-PCR |
| MERTK_ex16-18  | 3546 | GGGAAAAGAGAAATATGATGTTTGCCAAGAA | ATGCACTACAAGGCGAAGCTATTATCTGTG    | LR-PCR |
| MASS1_ex26-28  | 5083 | CTTATGGAAGAATGCATGTTATTGGGTGAA  | GATGAATCCACTCATCCAGAAATCAGAGG     | LR-PCR |
| MASS1_ex56-58  | 3452 | ATTCCATTGAAACATCACCAGTGAGCTAGA  | CAAGACTTCCAAAACAAAATGTGAGACAC     | LR-PCR |
| RGR_ex1-2      | 5074 | TGGTGTAAATTTTATCATGAGCCAGAGCAT  | TAAGGTTCCAGAGAGGATCCCTGACTTGC     | LR-PCR |
| IMPDH1_ex4     | 975  | GTCCTGGGTGGCTGGATGTAGAG         | AAAAAGCGCTGGACTAGACAGTTG          | LR-PCR |
| PRPF8_ex34-38  | 4014 | TTCTTGAAACATCCACTTTGACCAAATCTC  | ACAATTAACCTTCTCTCAGCTGCCACAG      | LR-PCR |
| OAT_ex4-6      | 3085 | TGCCTAAAATAGGAATTACAAGGCCAGACT  | ATAGCAAATTCGAAGGCACACTCAATTCTT    | LR-PCR |
| CNGA1_ex8      | 1915 | CCTCAAACCTCCAGGCTCAAGTGATATT    | TCTTTGCACATTATCAGTTGTAAAAATCC     | LR-PCR |
| USH1C_ex20-24  | 5176 | TTTCTTAGAGCCGCTCAGTAGTTTCTGTGA  | GTCTAACCCTGTATCATCCCCAACCTG       | LR-PCR |
| SAG_ex5-6      | 4713 | TTATGTGTACAGGCAGGAAATTTGGGAAG   | ACAACAACAAAACCTTCAACAAAGGGGAAAC   | LR-PCR |
| RHO_ex1-5      | 5249 | TAGGAGGGGGAGGTCACCTTTATAAGGGTCT | TAAGGAGCTATGTGACTTCGTTCACTTG      | LR-PCR |
| PDE6A_ex14-17  | 3382 | ATCTGATCCAATATGCTCGACCCATTAT    | CAAAATGAAATAGTCCCAAGGCTTGTGAG     | LR-PCR |
| MASS1_ex2-4    | 4848 | TGTCGTCACATATTTGAGTTTGATGGCTTA  | CACTTTCTTTAGGTGACATTTGGGGAAATC    | LR-PCR |
| MASS1_ex29-31  | 5596 | ACTACACTCCAACACTCCAGCACTCCAG    | TTTGACATCCTCTCCAAAATGTTACAATGG    | LR-PCR |
| MASS1_ex60-64  | 5383 | CTTTTCCCATTTTCCCATAAAGAACCTAA   | GCTACCCAGAGTGAGTCCACACAATAGAAA    | LR-PCR |
| RGR_ex3-6      | 4440 | CAGAACTTCCCTTGCCATAGTCACATGTAT  | ATCAAAAGGCAGATGCTGGCTAGAGATTAG    | LR-PCR |
| IMPDH1_ex5-9   | 4215 | CTTAAAGGCAATGGATATTTTGGGCCTATT  | AGGGGATAGAGAAAGGAGTTATTGCTCAGG    | LR-PCR |
| PRPF8_ex39-42  | 1566 | CACTATTTAGTGGCTGTCAGGTTGG       | GTCAACAACACAAGCACAGACAGA          | LR-PCR |
| OAT_ex7-9      | 4246 | AGAATGCTTAGTGCTGAGAAATGACATGGT  | ACTGAAGGACTTGATTTAGAGGCTGTCTGT    | LR-PCR |
| CHM_ex3-4      | 3463 | TGATGAAACATTTCTTTGGGATCTGAGAG   | GGTAAATTCGGAGGCGTTAAGGTAAAATGT    | LR-PCR |
| USH1C_ex25-27  | 4539 | ACTAAATGCCCTTTGACTAGCCACTAACCA  | ATGAGCTCAGAGTAAGGTTTGGAGTGACAA    | LR-PCR |
| SAG_ex7-9      | 3545 | AGTGGGGAGAGAACAGAAGCCTCCCTAAAG  | TTCTTTGGCTTGCAATTAATCCTCAGAACTC   | LR-PCR |
| RDH5_ex2-5     | 3556 | AATTTCTCAATATGCTCACACCAGATGCTT  | GGCAGAAATAAATCAAAGTCTTGTCCCTTG    | LR-PCR |
| PDE6A_ex18-21  | 5221 | GGAGAAAGGTGAGAGAGATGGAATTAACCA  | GAATGAGACTCCGTGTAAGAGTCTCTGAGG    | LR-PCR |
| MASS1_ex5-6    | 2968 | GTACAGTGTGGATTGATGTGTCTGTGGAAA  | TGGTTGCCAGTTATATTCAGATTCATCAGC    | LR-PCR |
| MASS1_ex32-34  | 4926 | CTGGGTTTGTAAGTGTAAATGGGGAGTTCT  | AGAGAATGGCAAGCTAGAACATGGTATTGG    | LR-PCR |
| MASS1_ex65-67  | 2942 | ATATTAGTTTTGGCTTCGTACAGGCACCAC  | CTTGGGCAATGAGAAAACACACTACCATAC    | LR-PCR |
| RGR_ex7-10     | 2921 | AGCAAGCTGACATCTCCTGTGACAATTTCT  | AATTCATGACAGAAACCTCAAAGCACAAAG    | LR-PCR |
| IMPDH1_ex10-16 | 4664 | GTCACCTAGTGGCTGACTGGGGTACTTC    | CTTGATGGGGACTAAAGGACAAGGAAC       | LR-PCR |
| RPGR_ex4-6     | 4162 | ATATATAAATGCCTAGCCGCTGCTTCAGAC  | CATTACATGGACAACCATGGCATTATTTCT    | LR-PCR |
| BBS5_ex1       | 1151 | CTAGGTGCCCTGCAATCATTAAAC        | CTTCCATGAAACTGAAATCCCAAG          | LR-PCR |
| CHM_ex6-8      | 3208 | TGAATTTAGCTAATCAATTCTGAGCCTGT   | ATTTTTATCAAGCTCAAAGAGAGGCCACAC    | LR-PCR |
| ROM1_ex1-2     | 1999 | AAGTGACAGCAAGACCCAAGCAACTAGG    | GCTGTAACCAGTCTCTCAGCCACTATGTTT    | LR-PCR |
| RD3_ex2-3      | 2711 | GATTGCTCAGGGAAATTAAGCCACCTACTT  | CCTCATTTTATAGCAGCGTCTTGGGATGG     | LR-PCR |
| USH2A_ex14     | 1336 | TATCTGTTGGAATGGAGCTGATTAGAG     | GCTATGTTTCTCATCTGCCAGTCTTTA       | LR-PCR |
| USH2A_ex42-43  | 1639 | GTCTAGTCCAAAGGCCTCAGGAGAAATGTAG | ACAGCTGGGTGATTAATGCCACAGATAATA    | LR-PCR |

|                  |      |                                |                                    |        |
|------------------|------|--------------------------------|------------------------------------|--------|
| USH2A_ex65-67    | 3634 | CTTCCTGTTGTGTTAGTTGCTTTTGGTTG  | TTTTACCCTATCCCCACAAGAAAATCCTTC     | LR-PCR |
| MYO7A_ex33-37    | 5348 | CACCTGCATAGAGCTGGCACTCAAAAGT   | AAGATAAGATGAGACACATAGGACGGGTCA     | LR-PCR |
| CRX_ex2-3        | 2291 | TCTGAGAACCTTAAGCAGAGGCCATTTTAC | TGTCCCTTTATAACTTTGGCTGTCCTCT       | LR-PCR |
| LRP5_ex19-21     | 3618 | CTAGAAAGGGTCCCATCTGTCTGCTCTCT  | AGTATTTTAGCCACGAAAATCACCTGTGT      | LR-PCR |
| CACNA2D4_ex27-29 | 1754 | CGGAAGCACCTCCTCTCTTTAACTTGACT  | TTTCTCTGACTCCCTGAGTTGAAAAGTGCT     | LR-PCR |
| CACNA1F_ex32-43  | 4882 | TGTCTCTGATCCATCACCTCCTTTACTCTC | TATCACCCCTATTCTTACCTGAGCCCTTG      | LR-PCR |
| CDH23_ex26-27    | 2573 | GAATTCATTCCCTACTTGGTCTGGTGCT   | GCAAGTGCTGAGTAATGTTTGGTGAGTG       | LR-PCR |
| CDH23_ex49-53    | 4153 | GACATAACTTCCCCAACATCACCTGCCTTA | TACACCCAGGTATGTTTAGCTGCCTATTTG     | LR-PCR |
| NR2E3_ex1-8      | 3947 | AGTTCAGACAGAGTTCAGGAAGGGAGACAG | TTCAAAGTGGGCTCCTGTTCTAACAAATA      | LR-PCR |
| RP1_ex4          | 5798 | TTTGGATATTTCTAATTCTCTGCCTTCCA  | AAATGAATTGACAAAGAATGAGTGTGCTGA     | LR-PCR |
| USH2A_ex18-19    | 2988 | TGGTTTGTTCCTCATGAGTATGCCTTTA   | GGCAGAGAGGTATATCAGCCACAACGTAA      | LR-PCR |
| USH2A_ex45-46    | 2080 | AGCACCACCAAAAAGGAGATCTCATAAGC  | TCACATGTTTGCCTACAGCACACAGATTTA     | LR-PCR |
| USH2A_ex68-69    | 1921 | TTTTCTTTTACCCCTGATACTGGTTGTTT  | CTGACAACACTTGGCACAATTTCTTCTGTA     | LR-PCR |
| MYO7A_ex39-44    | 5061 | AGATCATGCCATTTTGTGAGTGTGCAG    | AGAATCAGAAGATACAAGGATCAGGGGTTG     | LR-PCR |
| LRP5_ex1         | 1324 | TCAGTTCTGTGAGGTACTGCAAGC       | CCCGGTGGGGAGACAAAGG                | LR-PCR |
| LRP5_ex22-23     | 2986 | GTTCCCTTTGCCCTTACTGAGATGACC    | CCCATCACAGTTCACATTTCTCATGTTTT      | LR-PCR |
| CACNA2D4_ex30-34 | 2486 | GTCTCATAGTCAGCTAGCGGGTACTCCTT  | GCTTCCTCTTGAATCTTACGTGTTCTCA       | LR-PCR |
| CACNA1F_ex44-48  | 2134 | AAAATCCAAAAGCCAGTGTTCGTAAAGG   | GAGGGCAGGAGGTTTATTGAGCAGTTGG       | LR-PCR |
| CDH23_ex29-30    | 1743 | GGACATCCTCTTGGGGATTAGAAAGACATA | AACTAATGGCCTTCTCTGTTCTAGCTGTGG     | LR-PCR |
| CDH23_ex54-60    | 5473 | GATCTAGGATTGTGCAACCAAGGTAAGTGA | ATTGCTGAATAGGTGGATGAATAGGATTGG     | LR-PCR |
| FSCN2_ex1-3      | 1323 | GAGCACTCAGAGGGCGCATC           | AGAAAATGGGGTGGAGAAAAAGAA           | LR-PCR |
| CABP4_ex1-6      | 3760 | GAGCTGAGTCTTCTGCGCTCTAGCATTAT  | AGGCCAGGTGTTTTCAGGGATAGAAGTAGT     | LR-PCR |
| USH2A_ex23-25    | 4729 | TGTTTGAAATGTATGCATGCTTGTATCAGG | TCAAGAATATATTTGTGTGCACCATTGGAA     | LR-PCR |
| BBS9_ex18-19     | 4848 | TGTGACCACCTACCTTTGGAATTAGATTTG | GGTTTTTCTGACTCTAAAGCTTGTGCACTG     | LR-PCR |
| MYO7A_ex5-12     | 5533 | TTAGAGACTCCACCTCCCTCTTCATCAAAT | TCGCAAGGGAGAGACGTGATATTTCTTATT     | LR-PCR |
| MYO7A_ex45-49    | 3915 | AACTGCTGAGTCTGTGCAGGCAGACTTG   | AAGAACATCAGAGGCCAGTTGGTATAGTC      | LR-PCR |
| LRP5_ex4-5       | 2400 | AAAAAGAAATTAATTGGGTGAGCAGCAATG | GAACCGACACCTGGAAAGAAAGATCCTC       | LR-PCR |
| CACNA2D4_ex1-2   | 4012 | AGGCCAGCGGATTAAGGGTTTTCATGTT   | GCTTTGGGAGTTGAGAAAATCATTACCC       | LR-PCR |
| CACNA2D4_ex36-38 | 2630 | ACTGTCTCCAGTCTGCTAGGAAAGGAAATG | GACAGGAAGGTTAGGTCAGAAGTATGCTCA     | LR-PCR |
| CDH23_ex7-8      | 4437 | GTTGGCTGAAGGATGTAGAGAATGGGCTTT | GTTTCGCTGTGCCAGAACACTCATCACT       | LR-PCR |
| CDH23_ex31-32    | 2207 | CATTAGTCAAAAAGCCAAGAGCAAGATGAA | AATGTTGGTTAGATTGGAAGAAATGGTGCT     | LR-PCR |
| CDH23_ex61-69    | 4042 | AACAGAGTCACAAACTTGTCTATCCGCACT | TTCTTAAAGTGACATCACCCCCAAAGGTAT     | LR-PCR |
| KCNV2_ex1        | 1666 | CTCTCTAAGACAGTGCAGGCCACGTGAT   | CACTTACTTACTGATCTGCTGAGTTCTCTTTCCA | LR-PCR |
| LRAT_ex2-3       | 5286 | GTTCCCTTATCCGTCTCATTCCCCATTGTG | AATTCTACCACACCCTGTCGTATTTCCAAG     | LR-PCR |
| USH2A_ex26-27    | 5671 | ACTCAGTGGCAGACTGTGTCTAGAGTTTTC | TGAAACACAGAACCACCAAAAACGTTAGC      | LR-PCR |
| USH2A_ex51-52    | 4159 | TTCGAACATTTCTCTTGTGTGTTCTTTTC  | TGCAGCTTTTGAAAAGGAAATTGGATTTA      | LR-PCR |
| MYO7A_ex13-15    | 4472 | CTTAGCTCTCCTTCTGGCTCACAGAGTG   | AGTACAATAAGAGGACCAGATGGGAACACC     | LR-PCR |
| RDH12_ex1-5      | 5114 | CCCTAAGGTTAACTGCTCTTCTGACGTCTC | CTCTAATTTGGTCTGAGGACCATTTTGGCT     | LR-PCR |
| LRP5_ex6-7       | 4138 | AGAGGTGTCATGAGGATGAACGAGTGAC   | TGATAACATCTTACGTAACACAGGACGTTG     | LR-PCR |
| CACNA2D4_ex3-4   | 3575 | TAGACACCTGGAACAGAGAGGATATTTGA  | GCAGTAAATGTCTATGGAATCAGTGATCG      | LR-PCR |

|                  |      |                                |                                  |        |
|------------------|------|--------------------------------|----------------------------------|--------|
| HTRA1_ex4-8      | 5561 | TCCATGATATCTGTGCCTTTACCTATTTGG | CAAGGATCAACATAATCATCTGAGCCAGTA   | LR-PCR |
| CDH23_ex10-11    | 2248 | CCAGGGCTCTTTCTATTACTCTTGAACCAG | CAGGGTGTAGGGGATAATCCAAAAGTAGAG   | LR-PCR |
| CDH23_ex33-35    | 4742 | GGAATGTGAGAGAGAAGAAGGAATCAACA  | ATAGCTCTGAGGCAGCTCTGTCCCTTCT     | LR-PCR |
| PDE6B_ex1        | 1622 | CAACATGGACAGATAAACTGGAAGATGG   | TAGGTACTTGCTCCTCAGCACAGAACTAGC   | LR-PCR |
| GUCA1B_ex2-4     | 4401 | ATTAAGGAGGAGGAGAAGCCCTGTGTTT   | CTGCCTCCTACCAGTCTTTGTGTTCTCA     | LR-PCR |
| USH2A_ex2-3      | 4138 | TGGAGTATCGCAACATCACTTAAAGTACCC | TTGGGGGAGGAAATGCTAGTATATCAAGAG   | LR-PCR |
| USH2A_ex28-30    | 3542 | GTTTTCCAAGGAAGACTCGAAAGTCTAGCA | CCCATGCGCATTGTAGAATTATCCTTTTTA   | LR-PCR |
| USH2A_ex53-55    | 3561 | AGGGAATTCTATTCTGTGCAATTCGGTATC | CCTTCACATAATGCATATCAAGGCCAAATA   | LR-PCR |
| MYO7A_ex16-19    | 5276 | GCAGTTTGCAAGAAAACCTCAAATACCG   | AGGTGAATGTATTGCATTATTTGGCTTACG   | LR-PCR |
| RDH12_ex6-7      | 5293 | AAAACGACATTGAAATAGAAGGACCTCGAA | TAGAAATAGGCAGTGATGGTGCTCTTCTTG   | LR-PCR |
| LRP5_ex8-9       | 3792 | AAACAAACAAAGCGTCATTTATCCAGCAC  | GTCAAGCTCAACGGACAACAAATATTTTAC   | LR-PCR |
| CACNA2D4_ex7-13  | 4516 | CACCTATGTGGTCTACCTGTGAAATTACC  | TAACTTCTTACTCCCTGGGGTCCCTAATC    | LR-PCR |
| CACNA1F_ex2-8    | 4253 | CATGGCAATTTAACTCTACCCCAACTTA   | CAGATGGGTTTTGAAGGATGTCTAGGAGTT   | LR-PCR |
| CDH23_ex15-17    | 4626 | GCAGTAATGACTTCTTGTCTCGCTGTTG   | GATCCTGCTGATGAGGGACACAGATGTT     | LR-PCR |
| CDH23_ex36-38    | 2645 | GATAGTATCTCTAGCCCTCCGAACTTT    | AGATGGACTAAAGGAGTTGTCAAGGATTCCG  | LR-PCR |
| PDE6B_ex2-3      | 2018 | CGACAGCCTCTTTAGCCTCTTTCCTCTCTT | GTCTTCACAGTTCTCCTTTGTGGCTCAG     | LR-PCR |
| CA4_ex2-8        | 4394 | CCCTGCTTGGTTTTCAATTGAGTCTCTTT  | CATATTTTAATCATGCCTAAAGTCCCACCTG  | LR-PCR |
| USH2A_ex5-8      | 4608 | GATCTGTAAGTTTCAAAGGGCAGTGACA   | TCAGAGTATCATAGCTTCTAAAAGCAACAGC  | LR-PCR |
| USH2A_ex31-32    | 2488 | GAAAGGGAGGAAAATGACTGAAAGAGGAAT | TTAAATTTGCAGATATGGAACCCCTGGATA   | LR-PCR |
| USH2A_ex57-58    | 2147 | CCAAGGCAGAGAAATTATCCACTGCTAGTT | TGGAATGAATGTTCAAGGTAATTCTGACCTAT | LR-PCR |
| MYO7A_ex20-26    | 4556 | TTTGAATGTCTACCTTCATGGGCTTATGTG | AGATCCCACCCTCTCAGACACTCCTGT      | LR-PCR |
| RBP4_ex2-4       | 977  | GGTGGGGTGAGGTGGGATAC           | AAAATGACACCTGACAAACCGAAA         | LR-PCR |
| LRP5_ex13        | 4350 | GTTCTAAAATGTGGCCCTTTTCTCTCT    | GCCATTTATCTATGTCCTGATGAAGCAACA   | LR-PCR |
| CACNA2D4_ex14-18 | 5704 | GATAATTGATGTGGTGACTGTGGTTCTC   | TCATTATAACAACAAAAGGGCCAGTAGCA    | LR-PCR |
| CACNA1F_ex9-14   | 2795 | GATAGAGTGAGACCCTGTATCTGGGGAAAA | GAAGACAGGAACCTGTGTCTGCTTTGATTC   | LR-PCR |
| CDH23_ex19-20    | 3215 | CTGACACCTCACCTGGCTCTGGTTATAC   | CTCAAAGCTGGTCTGCTCAAACTGAAAG     | LR-PCR |
| CDH23_ex39-41    | 2156 | ACAGAGCAGTTACCTTACTTGGCTTTTGGT | ATCTCTGGGAATAAGAGGTGGGAGAAGATT   | LR-PCR |
| PDE6B_ex7-11     | 3745 | TGGCACTCAGAGAAGAGAGTAAATGCTGAG | TCTGAGAGCAGAGATGACATAGATGGACAC   | LR-PCR |
| AIPL1_ex3-6      | 3943 | AACTGAGTTTCAGAGAAGTGCAGAGACCTG | GATCAGAGCATCAAATCCTCATTGTCATT    | LR-PCR |
| USH2A_ex10-11    | 3702 | ATGGTCACTTTTACAATTCCACCCTACCAT | GGCTATCATAATTTCCATTTGGCCCTAAGT   | LR-PCR |
| USH2A_ex33-34    | 1989 | TGGAGGAGTGAATCTCCTCAATAAGAAGT  | GACTTGGGAAAATCTACTGACTCAGGGTGT   | LR-PCR |
| USH2A_ex59-60    | 3628 | TTCGCTGTATTTAGGGCCATAAGTCTCACT | TCTTGTCTTGATCTGGTTTCTCTCTGGA     | LR-PCR |
| MYO7A_ex27-28    | 5373 | CCAGTTCTTCTGCTCACTCCTTAGATTCTG | CTAGCTTAGCCTAGTGGCTCCTCCCCATAC   | LR-PCR |
| RBP4_ex5-6       | 2348 | GTGAATGAGATTTCCCTGACTCCAAGATTT | ACTGACCCCCACGTGTATCTTTATGTGTAA   | LR-PCR |
| LRP5_ex14-16     | 4100 | TAGTTAGGAGCTGATTGGAGAGGAGAGACC | AGGCTGGTCTCAAGTAATCCTCAGATGGT    | LR-PCR |
| CACNA2D4_ex19-22 | 4694 | TATGGGTGTCCTAGGATGAGGTGTGTAGG  | GTGGTAGGGAAAAAGATGACAGACTCTGAA   | LR-PCR |
| CACNA1F_ex15-24  | 5051 | CTTACTCTCATCTCACCCCAACTCCAAAAT | CCACTGGTAGAAACATATGGTCACTTGAA    | LR-PCR |
| CDH23_ex21-22    | 1641 | TGCTAACATTTCTCGTGCAAGTTCTCAC   | CTAGAACTCTATTGCAAGGCCAGCTCAGA    | LR-PCR |
| CDH23_ex42-45    | 5069 | CTAGAGGAAGCAGAAGGAGTCTGGGGTCT  | AACAATGACCACGACTGTCTCTTCCAAC     | LR-PCR |
| PDE6B_ex20-21    | 2173 | GTCTGACACTAGAAACAGTCCAGAGCAC   | TGGTACTTCTTTCTTGAAAAATGGGGTTC    | LR-PCR |

|                  |      |                                   |                                 |        |
|------------------|------|-----------------------------------|---------------------------------|--------|
| CERKL_ex6-11     | 5392 | TGTGTAGACATTTGATGTGCATCTATACTGTGA | ATCTATATTAATCCTGGCGGATGCTTTTCA  | LR-PCR |
| USH2A_ex12-13    | 4935 | TTTCATTCAAGTTCTGTATATTTCCCCTGCT   | CCGATCGGCTGAGTTTTATCTAAAGTATCC  | LR-PCR |
| USH2A_ex36-37    | 5945 | ATTCTCATGCTGGAAGCTGTTGGGTTCTATT   | GGGAGAAGCTCTACAACGTACATTTCTAA   | LR-PCR |
| USH2A_ex63-64    | 5126 | GGGGTGAAGGTTAAAAAGGGGCTAAGTAAC    | CCGAGGCTAGAGATGTTTGTATTTGATTT   | LR-PCR |
| MYO7A_ex29-32    | 4820 | AAATAGATGGTGGAGCTGAGAGGGTAGGG     | AGATGGAAGGAGAATGAGTGAGCTGATGT   | LR-PCR |
| C1QTNF5_ex1-2    | 1477 | AGAGAGGCAGGTCCCAGGATT             | AGAAGCAGAGGACCAGGAAGAGAG        | LR-PCR |
| LRP5_ex17-18     | 4611 | GTGTCAATTTCCGTGTCAGTAGGAAGACTC    | TTTTCTTGTGGGCTAAAAGACAGACT      | LR-PCR |
| CACNA2D4_ex24-25 | 2724 | CAGAATCTCCCTTCCAAGTTCCATCTTCTA    | TATTCATATCTCGTCCCATTCCCCTACTA   | LR-PCR |
| CACNA1F_ex25-31  | 4499 | AACACATGTTGCTAACCATACATCCCCTGAC   | CTGAACCCAACAGGGACTCAGAAGAGATAG  | LR-PCR |
| CDH23_ex23-25    | 3579 | CATCTCTGGTGTCAAACTAATGCTTCAA      | ATTAACAAGGGAGCCTGTGCCTACAAGTC   | LR-PCR |
| CDH23_ex46-48    | 3760 | CCTTGCTCACCACTCTCATGTTTTCTCC      | GAGAGATGGAAAAGAGAAGGACGGTTCTG   | LR-PCR |
| TIMP3_ex3-5      | 3348 | CCCATTAATTATATCTCTTTGCCCAATCC     | CTGACCTCAGGCAGATGTTTAAGTCTTCAC  | LR-PCR |
| PROM1_ex2-3      | 3606 | AATAAGCTGTATGCGGTTTGTCTGGTAAATA   | CAAGAGCAACTTGAAATAGCAGACAAGGAC  | LR-PCR |
| CEP290_ex2-6     | 5171 | TAGTGTTAGCAAGGAAGCCGTCACATTTTA    | TTGATGTCCTGAGAAAAATGACTTCCAAA   | LR-PCR |
| CEP290_ex35-37   | 2387 | TTATAAATAAGCATGCAAAATAACTGCTGCAA  | CAGCCTAGGAAATAGAGCCAGACTTGT     | LR-PCR |
| CNGB3_ex16-18    | 3977 | GAAAACCTGAGCCATTTCTATTCCACATCT    | AAAAGGTTAGTGAATCACATCACAGCCAAG  | LR-PCR |
| PCDH15_ex21-22   | 2939 | AAGTGGGATAGGAACACTTGAACCAGAAG     | AAATGTTCCACCTGGCAATAATGAGAAACT  | LR-PCR |
| BBS4_ex13-16     | 3358 | ACACTGGGGAATAAATGGAAGCCTAAAAC     | CTCAAGAACAAAATACAGGGAGGGACTTGT  | LR-PCR |
| RPGRIP1_ex19-20  | 5158 | AAGAGCTAATATTTAAAAAGAAGGCAGGAAGG  | TTACAGGACACAATGGAGGATATGGGAGTA  | LR-PCR |
| RIMS1_ex25-26    | 1751 | GATTTGAATTCATTTCAATAATTGCGTGA     | AATGACCATCTAAAATTCATCATCCAGCA   | LR-PCR |
| BBS9_ex8-9       | 1679 | TGCAAATTAAGCACAAATATCATTTTCATGG   | TCTGCATCACTTGACTTAATGAAACGTCTG  | LR-PCR |
| PROM1_ex5-7      | 5318 | TACTTTCCAACCTGGACAATACAGGCACTA    | CACAAAAGAGCAGGCTAAAACACACTTCAT  | LR-PCR |
| CEP290_ex7-11    | 4309 | TAATATCCTTCAGTCTCCCCACCTCCAATA    | CTCATTTACGTATTGTCAATGGCTGCTTTC  | LR-PCR |
| CEP290_ex38-41   | 3664 | ATCAAGGTATGAATTGCAGCAACCACTCTA    | AATACAGCCAGGTCATCAAATTAAGGCAGT  | LR-PCR |
| CYP4V2_ex2-6     | 4935 | CAGTATTACAGGCAGTTCACACATGCTCTC    | CCTACACCGGGTATGTTAACAAAACATCAA  | LR-PCR |
| PCDH15_ex23-24   | 2565 | AATGATGGACTTTTCAGTGATAATGGGTCAA   | GAGTATGAAACTACTCCCTGCCTTGTCTATA | LR-PCR |
| FBLN5_ex1-2      | 4803 | TGAAGAGGGCTAAGCAAAAACCAGGTGCT     | AAAAGAGTCTTGGACTGGGAGTCAGGAAAC  | LR-PCR |
| RPGRIP1_ex21-22  | 2506 | AATGATCCACTGGACTGTGAGAGAGAAGAG    | AATATTCAGCATCAGCACAAAACCAAACCTC | LR-PCR |
| RIMS1_ex30-31    | 2719 | GCTGATTGAGATTTAGGCAGTCACTGAAAC    | TGCCACCCATGTCTACATTTACATCTATT   | LR-PCR |
| BBS9_ex10-11     | 4983 | TCACATGCTTATTACGGAAATGCCAAGTAG    | TACTTGGAGGACCAAACTTTAAACCAATGC  | LR-PCR |
| PROM1_ex8-9      | 2856 | TCACTGCCATCTAAAGTCATTTACCAGTCC    | AAGGTGGGTAAGAGCAAAAAGAAAACCACTG | LR-PCR |
| CEP290_ex12-13   | 1926 | AGGAACAGAGATTATGCCAGTAGTTGCTCA    | TAATAAACATGTCCATGAATTTCCCATGAA  | LR-PCR |
| CEP290_ex42-44   | 4057 | AGCGTTTCGTAAGGGATACTCAACCTGTAT    | ACCTGATTCTGCTTAAGGTGGAAGAATGAA  | LR-PCR |
| CYP4V2_ex7-8     | 4477 | TAGCACTTGAAAATTAGGAATTTGCGTGAC    | CCTTCCTGCTCATTACACTGTGTTTACAA   | LR-PCR |
| PCDH15_ex32      | 1976 | AAGAAGTGTGATTTGTGCATAAGGGAAGTGT   | AAACTGCATTTTCATTGAATTTGGGGTAAAA | LR-PCR |
| FBLN5_ex3-4      | 3921 | ACAGGTATTGGTATTTTGGAGGCCTTTCTT    | AGAGTAAGTCATTGTTTCACTGGTGCATTG  | LR-PCR |
| UNC119_ex2-5     | 1904 | AGTAGGATGGCACTCCTTATCCCCTGTTAG    | CTAAGTTGTCCGGAAGTCCTGACTGCTCCT  | LR-PCR |
| RIMS1_ex32-34    | 3510 | AACTGCACATAACTGCAAAAGAAGCTGAAAC   | ATTCCTAGTCACCATTTTTGGGAAGTCAAA  | LR-PCR |
| BBS9_ex12-13     | 4913 | CACTCATTGTGTTCACTCACTGCTGTGTAA    | AGGTCCAACAAGTTCAGAAAAGCACCTAGA  | LR-PCR |
| PROM1_ex10-11    | 4990 | CAGACTTTGCCAAACATACCCTAGTTGAGA    | CTGTACACAGGAGTCATGCGAACCTTCTAT  | LR-PCR |



|                 |      |                                 |                                   |            |
|-----------------|------|---------------------------------|-----------------------------------|------------|
| CEP290_ex14-18  | 4929 | TTTGCAACCTTTTAAAATCCATACCCCTTC  | CTGTGGGGTATTGAATGATGATCTCCTATG    | LR-PCR     |
| CEP290_ex45-49  | 5589 | TCACCAGAACTCCGATTTTCTCATATTC    | CATTTCAAGGAAGAAAAAGTCTCCAACAAT    | LR-PCR     |
| GRM6_ex2-4      | 2489 | GCCTCTGGTCTCTGCTGTTAATCACTCTAA  | TCCTATTGTTAAAGTGAGCCATCTGTTCCCTG  | LR-PCR     |
| RPE65_ex6-10    | 3501 | TCAAACCTTATGGTTTCAGGTCAATCTGCAT | TTGATGCTTCATCTCTCCAGAACTTCAAAT    | LR-PCR     |
| FBLN5_ex7-8     | 4792 | TTGCTGGTGCTTTTTCTGCCTAGTTATTGT  | AGGCCATAAAAAGTCTGCTTAGCTCTGG      | LR-PCR     |
| RIMS1_ex3-4     | 3464 | ATAAGCAAAACAGGGATTATGGAATCATGC  | CACTGTATCATGAACCTCAAATATCCAGA     | LR-PCR     |
| TULP1_ex9-13    | 3756 | GTATGCAGTGGGAGGAGACTACACAAAGG   | GGCACTCAATATGTGTGGTCAATGAAGATA    | LR-PCR     |
| PROM1_ex13-14   | 2646 | TGGATGATCTGTTTCACCTGAATAACACTG  | CCATTAGTGCATCGTAGGGTCACCTTAACT    | LR-PCR     |
| CEP290_ex19-22  | 4450 | ATGATTGCTGCTATGTCTTCATAGCTCGTT  | CCATATATTTACATGAATGACAGGTGTGC     | LR-PCR     |
| CEP290_ex50-53  | 5888 | GTCAAATCAGGCTCCATCCTTGGAAAATAC  | GCCAATGTGACCCAAAACCTTAAAGAACATAC  | LR-PCR     |
| GRM6_ex5-8      | 3660 | AAAAGTCTTTCAAATGGTGAGGCTCTGAGT  | CTTTTGGCTTTGTAACGTTGCGGACAGT      | LR-PCR     |
| RPE65_ex11-14   | 2311 | CTTAAGAACTCTGCATTTCTGGCTGTTTGA  | TATTGCATGATACTTCCCTTGACTCAGCAAA   | LR-PCR     |
| FBLN5_ex9-10    | 4280 | TACAGCTCTGTAGTAAGATCCAGCCTACCC  | GACCTAAGATTGCATCTTGGCCTAACTTCC    | LR-PCR     |
| RIMS1_ex7-9     | 4569 | TTGTAGCATACGTTTCATTCCAGTGATTCAA | CCTTACTCTCCAGATTGCTGCTGATGTAGA    | LR-PCR     |
| TULP1_ex14-15   | 2299 | TCAGTACCCTAATGGATGAAGATGTCAG    | GGGAGGTTAAAACAACAATGACTACTGCT     | LR-PCR     |
| PROM1_ex15-18   | 4694 | AGTAAAGCAAGGCAAGAAGTCAAGAGTGGT  | GCAATTATTTGTCTAAAGGCCAGCTCAAC     | LR-PCR     |
| CEP290_ex23-25  | 3382 | ATAAGAGAGGGTATGTGGCCGAGTGACTA   | GAACAACCAGATACTCTTGAAGTGATGCAA    | LR-PCR     |
| CNGB3_ex5-6     | 1636 | ACATGCGGTGTTTGGTTAAGAAATTCAA    | AATCTAGGCACTTCACAGGCCTCAACTTAT    | LR-PCR     |
| GRM6_ex9-10     | 2213 | GCAGTAAATGGCATTGGTAATGGCTAGAAT  | TCCTCTTTGGACTTCGGATGAGAGAATAAG    | LR-PCR     |
| BBS4_ex3-4      | 3571 | TAACCAGGGAAGGAGAGATTGAGAAGAGAC  | TGTTGTTGTGTGTTTTAAGTATTACCCAAAAAG | LR-PCR     |
| RPGRIP1_ex6-9   | 5071 | CTTGTGTTCTAGTGTGGGTAAGACGGGAAG  | ATAGTGTCAAATTCCTTCCAAAAGACTGC     | LR-PCR     |
| RIMS1_ex10-11   | 3854 | TGACATTATATGGCAATCAATTTGCTTTTTG | TTATTGCCATCATTGCCAACATCTAGTACC    | LR-PCR     |
| BBS2_ex3-5      | 2319 | GGTCACATCGTTTTTGTTCAGAAGTGAAAT  | GTGATGGAGTAAAACTCTGCCTCAAAAACA    | LR-PCR     |
| PROM1_ex19-22   | 4072 | AGACAGATTTGATGGCTATCTTGTTGGGAAG | CTTTAGATAGCAATGGGAAGCCACTGAGGT    | LR-PCR     |
| CEP290_ex27-29  | 4865 | TAGGGACACAGCCAAACCATATCAGTATGT  | TACAATAAACAACCATTCTCCTCCATCAC     | LR-PCR     |
| CNGB3_ex8-10    | 4528 | TCAACTTTTACAGACATCAGCGTAAATCCA  | CCCAGTCTCTGTATCTTTCCACTCTCTG      | LR-PCR     |
| PCDH15_ex11-12  | 3499 | CCTACTATGCAGACATCAGTGCTAGCCTTC  | TGCCTGACTTACATGTTTTCAAAGTTACCA    | LR-PCR     |
| BBS4_ex5-6      | 2160 | TGTTGAATTTGAGGTATTGATTCCATTTGC  | CTGCAAAGTTATGAGGAAACATGGTTTTTG    | LR-PCR     |
| RPGRIP1_ex10-13 | 4603 | CTCAGTAGGACTCAAAAAGTCCAAGGCAGT  | ATATGCTAAGGGTATGAGAGGCACCCTTCT    | LR-PCR     |
| RIMS1_ex13-16   | 3132 | TGTGTGTTTATGCTTTCAAATTTGGTGTGTT | AAAGCTTTAAAAGTTACAGCCATGCCACAT    | LR-PCR     |
| BBS2_ex8-13     | 4758 | ATCTCCTGAGAAGTTGTAGGGCTTCATAGA  | AACAGCTATTCCAAATTATACCCAGTGTC     | LR-PCR     |
| PROM1_ex23-25   | 1524 | GATGAAATGAATCCTAACAATGTGCGTAGC  | ACATTTAAACTCATGGCATCATGGAACACT    | LR-PCR     |
| CEP290_ex30-34  | 5288 | AGATAGATGCTGAAAACGAATGGCTTTTTG  | TGCATTAAGGCAATGAACCTGAAAATTGAT    | LR-PCR     |
| CNGB3_ex11-12   | 4508 | ATTTTGGTAACGGCTAGTAAACACCCTCCT  | AGACAATGCCTAATTTTCCCACTTCTTTT     | LR-PCR     |
| PCDH15_ex18-19  | 3355 | TGTTACCTTCAATTACAGTAGCCCGTCAAAA | TTAGGACTTGATGGAAGTCACAGAGCTGAT    | LR-PCR     |
| BBS4_ex10-12    | 2459 | CAGACTCTTTAACTGCCGTCTCCTTGCT    | ACATAAATGAATTGTCAAGGCAAGAGGAAA    | LR-PCR     |
| RPGRIP1_ex14-18 | 4354 | CCAGTCACTCCTTTTGTACCTTCTCCCTAA  | TAGTGCTTATCTTGTGTGCTGCTTCTGCT     | LR-PCR     |
| RIMS1_ex17-19   | 3199 | ATCGTAATGTCTGAGGCATCAACTGTCATA  | AATTGCAGAACTGGTTCCCTCAGTTTTAGG    | LR-PCR     |
| BBS9_ex3-4      | 3831 | AGTGTTTTCGACAGCCACAAGCAGTTATAG  | GAAGACAACCAAAAACCAAGAAATTGGAAC    | LR-PCR     |
| ABCA4_ex11      | 554  | GCCCCACACATCTTCCCTCTATT         | ACAGGGGATGTAGGGATTCTTGTT          | Normal PCR |

|               |      |                                |                                |            |
|---------------|------|--------------------------------|--------------------------------|------------|
| BBS7_ex19     | 651  | AAAAACATGGCTTTTAGGTTTGTGT      | CATTTTGAAGCCTATAAAGCGGTCT      | Normal PCR |
| CNGB1_ex25    | 548  | ACTCAACTCCTCTGCACACATCAG       | AGTGATTGCTTAGGAGCAAAGTGG       | Normal PCR |
| CRX_ex4       | 983  | AGCACCTCTACCAATAAGTGTC         | ACGGTGTTAGGGTTGAGAGAATCA       | Normal PCR |
| FIBL6_ex86    | 402  | CCTCCTCCTCCCTCCTTTAAATCT       | CTCCATCAGCAGCAGAAAATAAA        | Normal PCR |
| ROM1_ex3      | 896  | TTCTTTTTCCCTTCTGAACACCTG       | TGTCACCTTCCCATCACTCTGTTC       | Normal PCR |
| PDE6A_ex6     | 541  | TAAACAACAATAACTACGGGGCATACGAT  | CACCGATAAAGCCAATTGAGATCTTTAAGC | Normal PCR |
| MASS1_ex59    | 459  | TGCCTCTATTCTCTGGGTCAGAAT       | TGGGGAAAAATTACAGGAGTGCTA       | Normal PCR |
| MASS1_ex86    | 438  | TGAATGTTCCAGGGAACCTACTGT       | ATTCAGTGACATTTTCCCACCATT       | Normal PCR |
| CERKL_ex12-13 | 1474 | AACCCAAAAGGCTTTGGATAAGAG       | GAGTGCCATGTTCTCAAGAGAAT        | Normal PCR |
| USH2A_ex22    | 527  | GGCCTAGACCATGCGAGTATATTG       | TTTTGGTTGTTAAGCCCACAGATT       | Normal PCR |
| USH2A_ex50    | 706  | CTTACCTGTAAGTTGCCATGTGTG       | CAATGCATTCATGTGTGGAATTTT       | Normal PCR |
| ABCA4_ex25-26 | 924  | ACAGCTAGCTAGTCGGGAGGACTT       | CCCCTTAGACTTTCGAGATGGAAC       | Normal PCR |
| BBS8_ex1      | 981  | GACTTTAGGTCTTGATGGGTGGATGGTACT | TTTTTAGAAATTAACAACGCACACGCTGAG | Normal PCR |
| CNGB1_ex30-31 | 1169 | CAAGTCTACAGATGGGGTACTGA        | GCAAAATCTGAAGATGGATTGTGA       | Normal PCR |
| FIBL6_ex1     | 662  | CGCCAAACTTTTTGCTAGTTCTAGA      | TTCGTAACCTCCATTTCCAGGTT        | Normal PCR |
| BBS5_ex2      | 1353 | AAACCTTTGGAGGTTCTCTCTGT        | TTATTGATCCCCCTTTCCTGAAT        | Normal PCR |
| USH3A_ex1     | 714  | AGCAGAAAAGGAGAAAAGCCAAGT       | AATTGCCAATATTTCCAAAAACCT       | Normal PCR |
| PDE6A_ex22    | 377  | TCATCATCCTCGTGCTGCTATTTTTCTTAG | TCTTCTACTTCTCAAGGTGTGTGGTCTTCC | Normal PCR |
| MASS1_ex76    | 493  | TTGGTCATTTTCTGCATCATCAGT       | CCTGTTGTCGGCAAAGAGATTTAG       | Normal PCR |
| MASS1_ex87    | 475  | CCAGCAGGTGGTAGTCTAGGAGAG       | CTGTGTGTGGATGCTTGACTCTTT       | Normal PCR |
| USH2A_ex4     | 629  | GGGAGATATCATCACAGCACAAAA       | ATTGCCAGTAGTACCACGAAGAG        | Normal PCR |
| USH2A_ex35    | 502  | TTTTGGGACCAAGAGTGAAATGAG       | CAATGTCACCTCACTACGGCATT        | Normal PCR |
| USH2A_ex56    | 439  | TGAAATTTGCCAATACTTAGCC         | GCCTGAAGAATGGGAACCTAGAAT       | Normal PCR |
| BBS1_ex1-3    | 1427 | AGTCAGAATCCTCTGCATTTGTCC       | CCCATTATCCAGCTTCAAAAATTG       | Normal PCR |
| BBS8_ex7      | 954  | CTAACAGACCTCAATGAAGGGGGACAG    | GGGAGCTCTGGTTTTTGTGTTCTGCTAATA | Normal PCR |
| CRB1_ex1      | 385  | CAGCAACACACCAGAGGATGTTCTCTAAAT | CTATGTGACCATTTCTTCCAGCTCACT    | Normal PCR |
| FIBL6_ex2     | 364  | CCATGTACTGCAAGGTGAAAAGAC       | CAAACCCATCTGTCTCTATTCTG        | Normal PCR |
| BBS5_ex3-5    | 1266 | CCAGAAGTCCATATCCATCTCATTAGTG   | ATACCCTCACCAATTCGTGGAAAACT     | Normal PCR |
| USH3A_ex4     | 577  | AAATTACCTCAAATCTCCTCTTTGC      | CCCTACTGTTGAGCAAGTGTGGTA       | Normal PCR |
| MERTK_ex2     | 1098 | CCTAAGAAGTTGGGAACCTACTTGGGAAAC | GTAGAGCTCTTGGGTCCAGCTGTACTTGAT | Normal PCR |
| MASS1_ex77    | 639  | TCTAGTAAGAAGCTCGCCCAGAGA       | AAAGCTGAGCTGTTTCAAGGATAAA      | Normal PCR |
| MASS1_ex90    | 399  | ACAAACAGTAAAGATTGAGAACCCAAA    | GTGTGCTCAGTCGAATGGTTAGTG       | Normal PCR |
| USH2A_ex9     | 779  | ATCCACACGATTAAGGAGAAAAGTATTTG  | CCCTGATCGTCACAGAAAATAAGTAACA   | Normal PCR |
| USH2A_ex38    | 607  | AATTGGCCAGGTCAACTCAGATAG       | TGGATGAAAGCAGTCTCAACAAAA       | Normal PCR |
| USH2A_ex61    | 815  | ATGATATGGAGTTAGGCCACTGGA       | TATGGAAAATGGAAATCAGGCAAT       | Normal PCR |
| BBS1_ex16-17  | 650  | CTGAATGCACTGGAATATGCCAAACTG    | GAGTTGAGCCGCCCTAGGTACTCACTAAC  | Normal PCR |
| BBS8_ex15     | 354  | ATTAAGCAATTTGCCTTTAAGAACCCTTTG | TTTTCCCTTGCATAATGCTGCTTCATA    | Normal PCR |
| CRB1_ex2      | 1000 | TCTGTGTCCATTTAAGTCTTGTCTGAAGG  | AGTGCATTCAGTGGATTTTCAGCAGTTTAG | Normal PCR |
| FIBL6_ex10    | 358  | TTTTGCTCAGAGTAGAAAAGCCTCA      | TTGGGCAACTGCAAAGAAATTAGT       | Normal PCR |
| BBS5_ex6-7    | 1452 | GCTTGGGCAAGGTATTGAGACTT        | GGATGGAATCCAAGAGACACCTTA       | Normal PCR |

|               |      |                                 |                                 |            |
|---------------|------|---------------------------------|---------------------------------|------------|
| RP2_ex1       | 674  | TAGGAAGTGCCTGAGCTAGTGAGC        | CAGTCAAATATATCATGAGGCACCA       | Normal PCR |
| MERTK_ex7     | 715  | TTAGGCGTTTTCTCAGGTGTTTCAGTTATT  | GGCTTCTGTATTGACCACTGTGTTGGTAAC  | Normal PCR |
| MASS1_ex78    | 743  | ATCATCATTGCCCTTCAGTTTGT         | CCAAGCCTAAGACTGAGATTTCCA        | Normal PCR |
| CERKL_ex1     | 501  | CCCTCCACCTCCTTCTCCAA            | GAGAGGCGTGAGTTCCCAGTT           | Normal PCR |
| USH2A_ex15    | 532  | TGGCTAAAACAAGCCGTCTTACTC        | CACCTCATTGTTGATTTCACTCCA        | Normal PCR |
| USH2A_ex39-40 | 1355 | GATTCCATCCAGCATATGTTCTCC        | GGCTGTCTTTGGGGTATGAGTAGA        | Normal PCR |
| USH2A_ex62    | 680  | TCTGGTCCACTTTCTGAGTGTCTG        | ATCCATGGAGAGCATTTAGCTCAG        | Normal PCR |
| BBS3_ex3      | 509  | AAAGCAGATTGAAGTGGCACAAAT        | CTTTGTGGTGAAGGACAGGGAGA         | Normal PCR |
| CNGB1_ex2     | 937  | AACATTGTTGCAACCAGCTTCTTT        | CCTACCCACTGTCTGAACCTGAGT        | Normal PCR |
| CRB1_ex5      | 576  | CTTGTTCCTCACTAAGCCTCCTCTTACCAGA | TCCCTTTTCATTCTCCTTTATCCCTCTTTA  | Normal PCR |
| FIBL6_ex11    | 673  | AGATTTGGCTTGAGTATCCTTTGG        | TTTTGTGGCTGTAGACCACTGAG         | Normal PCR |
| BBS5_ex8      | 924  | CTGTGGCAGTTAATGAAGGAAGG         | GTAGGCCAGGAGAAAGGAGTAAGC        | Normal PCR |
| RP2_ex2       | 1042 | TCTTCTGGGAGGTGTGTATGTTGA        | TTACAGATGAGTCTGTTGGGAGAGG       | Normal PCR |
| MERTK_ex8     | 587  | TTGGTCTCATTGAGTGCTTTTCATAGAGC   | TATAAGAGCCTAAATTCATGAGGGCAAAA   | Normal PCR |
| MASS1_ex79    | 553  | TTTTGGTGATTATGCCTTTCTTT         | TCAACTTTCCAAGTGGTACAATGC        | Normal PCR |
| CERKL_ex2     | 493  | CCCTTTGCTCACTTTCTACCCTCT        | AGCAAATTTCAACACTTTCTCACG        | Normal PCR |
| USH2A_ex16    | 489  | TATTTATGCCAGCTGCTTTGACCT        | ACAGAGGAAACCACAACAGCATT         | Normal PCR |
| USH2A_ex41    | 1084 | CACACGCAAAATTTATGAGCAAAG        | CTAAGCATCATTGTGGCATTCAAA        | Normal PCR |
| USH2A_ex70    | 582  | CAAGGGCTGTAAGCATCTCGTTAT        | CTTGGTCCCCACACTTAGTGAAAC        | Normal PCR |
| BBS3_ex4      | 979  | AATATAACAATGGGGCTGGCTTCTGATAAA  | AAATGTTTCACCTTTCTCTGTTTTGCTCCT  | Normal PCR |
| CNGB1_ex13    | 666  | CATAAATGGCTCTTCTGTGTTCC         | AGACATGCATACAAGAGTGCCTGA        | Normal PCR |
| CRB1_ex6      | 1366 | TAGAGGAAGAATACAAAGCCTGCCATGACT  | AAAATTAATTAACGCACATCACTGCCCTCT  | Normal PCR |
| FIBL6_ex15    | 537  | TTCCCCAAGGTATCTTCAAAGAGC        | CTGAAATGCACCCTCTAATTTTGC        | Normal PCR |
| RDS_ex1       | 1339 | CACCTTTAATCTGCAGCGTTCAGG        | GAAAGGTTGGAAAACAAGGGAAGT        | Normal PCR |
| RP2_ex3       | 492  | ACCAGAACCACCCATCTGTAAGAA        | AGTTGTCTAGGGCTCCTTGAGTGA        | Normal PCR |
| MERTK_ex19    | 1003 | AAGATTCTGTAAAAACAAAGGCATGGATTG  | CAGAAGCCAAGTCAAATATGGCATTTCATT  | Normal PCR |
| MASS1_ex83    | 474  | CATGCCTGAATATTGGGCTTAACT        | TATGACTCTCCTGTCCCCATTCTC        | Normal PCR |
| CERKL_ex3     | 371  | ACATTCTAACAGACTTGTGTGTCATT      | CTCGAGCTGGCTGCAGTAGGTTAT        | Normal PCR |
| USH2A_ex17    | 1284 | ACCGCAAGGACTTTCTCTTAGACC        | TCTGTGAATGTGTGTCTGGCCTAT        | Normal PCR |
| USH2A_ex44    | 793  | ATGTTTTGGTTTTATGCTGGCAAGT       | AGCTCTCTGAAGGAAGGTGAACAA        | Normal PCR |
| NDP_ex2       | 588  | GCAGATACTGTGATGATGGATTGC        | ATGGGTGTGCACATGATTGATTAG        | Normal PCR |
| BBS7_ex13     | 905  | ATCACATTTGGTGTTTGCAATTGC        | ATGAGTTGATCATTGCTGAAGCTG        | Normal PCR |
| CNGB1_ex15    | 587  | CCTTTAACACCCTAACCCAGTCTCT       | AGGACCTACGGGTCCTAACAGC          | Normal PCR |
| CRB1_ex11     | 884  | CAGATTATTTCCATTAAACCCAAATGTGT   | CTGGCCTGTAATTTCTCAATTTTTGTGTCAT | Normal PCR |
| FIBL6_ex30    | 442  | TGGAGGAACTTTTATCTCAAAGA         | CCAGTAAACCCTGCTTGTCAACTT        | Normal PCR |
| RDS_ex2       | 711  | GGTTTTGGATTACCGTCTACCTCA        | TTTAAGTGGTGGGAAAGAAACCAA        | Normal PCR |
| PDE6A_ex1     | 955  | TATGTTTTGCAGACAAGACCCAGAGAAGTC  | TTACCTATCCACAGTACAATGATGGGAGCA  | Normal PCR |
| MASS1_ex21    | 704  | GAATCACACGTAAAAATTTAGGACAGGA    | GAGCATTAACTTTTCAGGCGAATTG       | Normal PCR |
| MASS1_ex84    | 496  | CATATCAGTTTGGGCAAGAAAGTCA       | TCTCTAACCACTCCCTTGTTCCTCA       | Normal PCR |
| CERKL_ex4     | 427  | CACCTAGTCTCTTGCCCATGATT         | TTTCCTATGCCAGATCCTGAGAGA        | Normal PCR |

|               |      |                                |                                |            |
|---------------|------|--------------------------------|--------------------------------|------------|
| USH2A_ex20    | 450  | AATCAATTAATCCTGGCTTGTCG        | GCAATCAGAGTTAGTGAGGGAGGA       | Normal PCR |
| USH2A_ex47    | 503  | GAGGGAAGGTGGGATTCAGACTAT       | TGTATTATGCTCCGCAAAAGGATT       | Normal PCR |
| NDP_ex3       | 1045 | TCTTTGGTTTTACTCGCACATCA        | CACATGCTTGGTATCTGGACTTTG       | Normal PCR |
| BBS7_ex14     | 505  | GAACAGAGTGGGACAGGAGAAAGA       | GTCCAACCTCAAACCAGCCTCTAAA      | Normal PCR |
| CNGB1_ex17    | 585  | AAACTGGGCTTTGAGAGCTAGGAG       | CACCAACTCGCTGTGTGATTTTAG       | Normal PCR |
| CRB1_ex12     | 916  | CTTCAGTCCCAAATAGAACTTTTGCAAG   | GTTTCAGTGATAGCCACTAAAGCCACAGAA | Normal PCR |
| FIBL6_ex36    | 488  | TGTCTTGTGCATGATGATGTGAAC       | CAGAAGATCCTAACACGAGCAATG       | Normal PCR |
| RDS_ex3       | 498  | TGGAGAAGAGTCAGGTGTGTTGAG       | GAGATTCAGACTTTCGGAGTTGGA       | Normal PCR |
| PDE6A_ex5     | 826  | GGTAAATTTCTTAGCCGTAAAGACCCTGCT | CTGTGAAATGAGTATGTTGGTCCCTGTTTG | Normal PCR |
| MASS1_ex51-52 | 1278 | AAATGGGTATGGAAACCTCATCAA       | AACAGCAGAGCCAAACTTTCAGAC       | Normal PCR |
| MASS1_ex85    | 463  | CCTGTGTTTCCAGAATTTTGAGGT       | CTCTTATGGCAACGAAATCTGCTT       | Normal PCR |
| CERKL_ex5     | 356  | TGTGTTGTCTTACCCATTGACACA       | GAAAAGAGGGGAGAAGGGTCAGTTT      | Normal PCR |
| USH2A_ex21    | 679  | GCCATTTAAATTTTGTTCCTACTGC      | TTGATCCAATAAGGCTGCTTCTTC       | Normal PCR |
| USH2A_ex48    | 970  | TCTTTGTGATTGTTTTGGCCTTTT       | AAAAATGGGAAGGCTAAAGTGCTC       | Normal PCR |
| BEST1_ex2     | 867  | TCTTGCCTTTCTACTTCCAAAAGG       | AAGTACCATGTGTTGGTCAAGTG        | Normal PCR |
| RS1_ex1       | 524  | GAAAAGTATCTTCTCCGCAACTG        | TCTGAGACCCATCCTGTTTTCTGT       | Normal PCR |
| LRP5_ex2      | 749  | ATATCTGGGGGAACAGACGTAACA       | TCATGCAAATTCGAGAGAGAGATG       | Normal PCR |
| GUCA1A_ex4-6  | 1399 | GGGCGTCTAGGAAGACAGATAGGT       | AGGGTTAAGACAAGAACACCACCA       | Normal PCR |
| CDH23_ex4-6   | 1400 | TTCCCTGATACCATCATGACACAC       | CAGCAGGTCTCTGATACCCTCAAG       | Normal PCR |
| CHM_ex1       | 314  | AACCCTCCAGGCTAAATGAGCTAC       | TCCTAAACTTTGTCCAGGAAGCAC       | Normal PCR |
| CHM_ex15      | 592  | CATCCTTGAAGAGTGGACCTCAAT       | TGTTGTGTGTTCTTGGAAATGTCTT      | Normal PCR |
| CNGB3_ex15    | 668  | AGGCAAACAGTACTCACGTGTTGA       | CTGGTAACAATGAACCCTCCAAAC       | Normal PCR |
| IMPDH1_ex17   | 318  | CATGGTCTTCCAGGGAATGCTG         | TCTGTGGACCACTCAGTTATGGAG       | Normal PCR |
| PCDH15_ex8    | 1257 | GGACATTAATTTGGGAAACACCAA       | ATGGATTAGGATGGTTTCTGTGGA       | Normal PCR |
| PCDH15_ex20   | 1423 | TAGCGCCAAATTGGAAAAATAAGA       | GTGTGAGCCCACTCAGAGAAAAAT       | Normal PCR |
| PDE6B_ex12    | 627  | TTCTTTTCATGTGCACACCTTTGT       | TTACTTCCCGTGTGCATTTTACCT       | Normal PCR |
| RPE65_ex3     | 230  | GGCAGGGATAAGAAGCAATG           | CTTTGAGGAGGAGGAGTGGC           | Normal PCR |
| RS1_ex2-3     | 1252 | TTCTTAGCATCTGCGGATGTTTTT       | AAAAGGAAGAGAAATGGGGTGTTT       | Normal PCR |
| LRP5_ex3      | 502  | TTAAGGCAGGAATACCTGAAACCA       | GCTGTTCCAAGTTCTGAGAAGTCC       | Normal PCR |
| SAG_ex1       | 515  | TCACCGATGAAACTCGGATGTTGA       | GTGCCTGCCACCATACCCAGCTAA       | Normal PCR |
| CDH23_ex9     | 301  | GTGGGTGCCATGATAGCTACAAA        | GAGGACTGTCCCTGTAGTCAGGTC       | Normal PCR |
| CHM_ex2       | 384  | CAGCAATGGCATGTATTGAACATT       | TGATGCATTTGGTTTATTCTCAAAGA     | Normal PCR |
| CNGB3_ex1     | 1241 | AAATAGTGGCCTAACATTGCGAGGA      | GGCTTGTTTAAAGTTTCCCTCCACCT     | Normal PCR |
| CYP4V2_ex1    | 721  | CCTCCAGTGCAATCACTACGC          | AAAGAAAATGCTCACTTTGGGATG       | Normal PCR |
| PCDH15_ex1    | 686  | TGTTAATGGATAATGTGGCACAGG       | AAAGTGCCAACACCAAAACAACCTT      | Normal PCR |
| PCDH15_ex9    | 541  | CCTCAGCTGATGAAGGGAAATAGA       | TGGTCATGTTTTGTGGTAAAACG        | Normal PCR |
| PCDH15_ex25   | 1399 | GAAATAAACACCTCACCCGAACAC       | ATTAECTCCGCAATTGAGAATCCA       | Normal PCR |
| PDE6B_ex22    | 765  | AACAGAGGCTAAAGCACTAAGAAAGGCTCA | TTTTCAAAGGTCTCCCAGTGGAATATCC   | Normal PCR |
| RPE65_ex4-5   | 1466 | ATGTCCGGAATTTTCCAGTAAGT        | ACTGCTGCATTGAGATTCCTAAG        | Normal PCR |
| RS1_ex6       | 415  | CCCATGTGATGGTGACAGG            | CTTTGTCTGACTTTCTCTGCG          | Normal PCR |

|                |      |                             |                              |            |
|----------------|------|-----------------------------|------------------------------|------------|
| LRP5_ex10-12   | 540  | GCAGAGACACATATGACACGGAGA    | CATAATCGAAGCCCAAGTCATCAT     | Normal PCR |
| NR2E3_ex9      | 745  | CTTTTCCTCGAAATTCCTCCTGAC    | GCCCAGATCAAAATCAACATTTCT     | Normal PCR |
| CDH23_ex13-14  | 1257 | GAAAAGAGAGCCAGAGGAGTTTC     | AAACCAGTGCCTCAGCTCAGTCT      | Normal PCR |
| CHM_ex5        | 838  | TGTCTGAGTCACATAAGCAAACG     | GGCTAAAAGAATCGATGGAAATTG     | Normal PCR |
| CNGB3_ex2      | 476  | CTGTGGAGGCTGAGTTGATTATT     | GCATCTATTGCATGGACAAATGAG     | Normal PCR |
| CYP4V2_ex9-10  | 692  | TCCACCTGTTCTTTTAGATGTCTG    | GCCCATGCAGGCGAATATACTAAT     | Normal PCR |
| PCDH15_ex2     | 1301 | TTTGACTCCAGACTGGCAATATGA    | TAACCATTTTACTGCTGCCAGTT      | Normal PCR |
| PCDH15_ex10    | 1080 | ACTGAAGCAATTAAGCCTCACTGG    | TACCAAAGCTTTTACGCCCTTCTG     | Normal PCR |
| PCDH15_ex26    | 1219 | AGGGTAAAAGGAAAGGAGGGGTAG    | AACCCATGCTTTCAAGTTGGTAAA     | Normal PCR |
| PROM1_ex1      | 894  | CAAGTTCTACCTCATGTTTGGAGGA   | TGAATTCAGAAGAGTATGGAAAACAACA | Normal PCR |
| RPGR_ex1       | 677  | AAACCGTCCTCTACAGCCTCCT      | TTGGGGAGTTTACAGAAAGTGTCC     | Normal PCR |
| USH1C_ex1      | 695  | GTCGCGGCTCTTTCCAGCTC        | CCTCAGTACCTCCTCCCTTCT        | Normal PCR |
| CFH_ex1        | 382  | GAGAACTGGACGTTGTGAACAGAG    | TTCCAGATCATAGTTTTTCAGAAATG   | Normal PCR |
| CACNA2D4_ex5-6 | 1018 | CTCCTGGATATTTTTGTCCCGAAT    | GTTTCATGGTGTGGTGGTTTCA       | Normal PCR |
| CDH23_ex18     | 416  | GGGGCTTACATTACCACGACTAT     | GAAGCACTCACCACTCCCTTACACT    | Normal PCR |
| CHM_ex9        | 521  | TAATTGGCTCTTGCTTAGGGACAC    | TCAGCATTTTTTCACTTGTGTTGG     | Normal PCR |
| CNGB3_ex3      | 395  | GCAGCATCTTTGTAGCTCATGTTG    | TGAGGTACGATGAACTGGACAGAA     | Normal PCR |
| CYP4V2_ex11    | 564  | TGAAGGAGCTCAGGATTTATCTGG    | CAAGATCAGTGGGATCAAGGAAAA     | Normal PCR |
| PCDH15_ex3     | 964  | CATGGGAGGCTCAGCTACTTTTTA    | TGACACACTTACATGTTGCCATTG     | Normal PCR |
| PCDH15_ex13    | 479  | GTGAAAAGTTGAGACCCAAGAGGA    | CTGTCTGCAGCCTTACTTTTCCAT     | Normal PCR |
| PCDH15_ex27    | 409  | TCTCCAACCCCTTGTGTAGATCAT    | CGAAGCCTAAACCTCACCAATATG     | Normal PCR |
| PROM1_ex4      | 630  | TGCTACAATATGTGCTGTTTCTTTG   | CTAGCAAATCAACTTGCAGATCCA     | Normal PCR |
| RPGR_ex2-3     | 1491 | TAGCACAGATTGTGCCATTTTATT    | CAATCCCTAGTCTCGATGTTTCTG     | Normal PCR |
| TIMP3_ex2      | 742  | GGCAATTGTGAATATTTGGGGTAA    | CTGTAAGCACTGTTGAGTCCCAGA     | Normal PCR |
| CFH_ex8-9      | 1186 | GCCTTCATACAAATTTACGCATCA    | GTCCATTGGTAAAACAAGGTGACA     | Normal PCR |
| CACNA2D4_ex23  | 368  | AGCTCCCTCAAGCTCACAGAGATA    | CTTAATCTTAGGCCAAAGGACGTG     | Normal PCR |
| CDH23_ex28     | 520  | AGCTAAAAGGAAGTACCCTTGT      | AGAGCCCTATCCTCAGCTCTGC       | Normal PCR |
| CHM_ex10-11    | 1035 | AAAGCCCTCAAATAGCAACAAGA     | GAGCTAGGCAAAATGGGGAGAC       | Normal PCR |
| CNGB3_ex4      | 644  | TGTATTCCACCAGCACTATTTCCA    | GTTTCAAATTCCTAGGCTCAAGCA     | Normal PCR |
| GRK1_ex1       | 991  | CACAGGCCAAGGGCAGCAGTC       | ACATGGACTGGAAGTCTCGTAAC      | Normal PCR |
| PCDH15_ex4     | 1108 | AACGAGTGCTTTGACAGTGATGAG    | AGGTAAAGGCCAAATGATCTGT       | Normal PCR |
| PCDH15_ex14    | 864  | AGCCCCAAGGACAGCTTTTATTAC    | TGGACAAAAGGCATACAAGACAGA     | Normal PCR |
| PCDH15_ex28    | 1476 | AAATCCAGTCATGAGATGGGAAAA    | TGTGCTCGAATAACATCCAAAGAA     | Normal PCR |
| PROM1_ex12     | 913  | TCAGTAGCCTTGAGAAAGCTCAGT    | CAAGCTAGCAATACTGCTGACCAA     | Normal PCR |
| RPGR_ex7       | 408  | TGACGGTAAGACCAGCTTTTTGTT    | CTGTACAATGGTCGTGCCTATACA     | Normal PCR |
| HTRA1_ex1      | 691  | GAGGCCCTCCTGCACTCTCC        | CCACCTGCCTGTCCCCGAGA         | Normal PCR |
| AIPL1_ex1-2    | 1466 | AATCACTGGAAGCAAAGGTGGAT     | CCCAGAAAAGACTAGTCCCAGGAG     | Normal PCR |
| CACNA2D4_ex26  | 396  | GCCTGCTTTTATCCCATCTCCTA     | CTTCATTTTGTCTCACTTCGTGAAT    | Normal PCR |
| CDH23_ex70     | 744  | CAGATTTTCAAGAAGCCAATCC      | AAGGTAGAGGTCAGATGCTGAATGA    | Normal PCR |
| CHM_ex12       | 313  | TTCCAAAATTAATCCTTACAAGCCATA | CTGTAATAACTGCCCCCTTTACCC     | Normal PCR |

|              |      |                                |                                 |            |
|--------------|------|--------------------------------|---------------------------------|------------|
| CNGB3_ex7    | 451  | TTAAGGATGAATGTGAGGGAAGGA       | GAGGCAGAACTTCAGGCTTATCA         | Normal PCR |
| GRK1_ex2     | 525  | ACCAGAAGTCCCCTGTATGTGAAG       | GTTTCAGGAACCAACAGCGAGAAG        | Normal PCR |
| PCDH15_ex5   | 1445 | ACAACAGATGCAGTTTCTCCACAG       | AAGGGCAAAATGTTAACTTCACCA        | Normal PCR |
| PCDH15_ex15  | 1496 | TTTTGAAGTCATGCTTTGTGGCTA       | AGGAAATATCAGGGAAGAGCCAAG        | Normal PCR |
| PCDH15_ex29  | 1360 | GAAGGTTACAGGACCCAAGGAGAT       | CTTCCCCAGACCTAGTGTCAAAGA        | Normal PCR |
| PROM1_ex26   | 614  | AACCAGTGTGTTGTCTGACACATT       | TGTATACATGCAGTCGTCCCTCTG        | Normal PCR |
| RPGR_ex19    | 424  | GCCTTTTGGTGAAAGGAAAAACTC       | CAATACACTTGGTGACTGTGAAAACA      | Normal PCR |
| HTRA1_ex2-3  | 1020 | ATGCATCTTGGCTTCCTCTAACC        | TGGCTCCTTACAGAAGTTTTCCTG        | Normal PCR |
| GUCA1B_ex1   | 804  | AGTTGGAGAGATCCATCAGCAGAA       | CAGTCTCCCAATACATGCAGGAG         | Normal PCR |
| CDH23_ex2    | 465  | CTAAACCTCCATCTGGGTTGATT        | GTATTTCTCAAGGCTCCTCCCAT         | Normal PCR |
| CEP290_ex26  | 732  | AGTGGCTAGTGCTTGACCAGAAAA       | ATGGTCCAGGAAGAGCCCTTAATA        | Normal PCR |
| CHM_ex13     | 576  | TGGGTACTTGTGGGTACTTCCTT        | GCCCATATCCCACCAAAATTAAC         | Normal PCR |
| CNGB3_ex13   | 552  | TCAGCAAGCATAATGTCTGGAAT        | CTAAAGAATAAGCCGTTGGCTGAA        | Normal PCR |
| GRK1_ex3     | 235  | TCTTCCATGATTTTACTCCCCATT       | AGGGCACCTCCTACCGTCAT            | Normal PCR |
| PCDH15_ex6   | 1268 | TCAGTGTGTTGAATGCTTTGGTGTT      | GAAGGAACCTAAGTCCCTGGTGAT        | Normal PCR |
| PCDH15_ex16  | 1078 | GCTGTGTTACTGAGAGGGGAAAA        | TAGATCATTTCAAGGAGCCAGGAG        | Normal PCR |
| PCDH15_ex30  | 250  | TTTTCACCTTTTGAATTGATATCCT      | TGATATAATCTCGGGTTTCTTTTTCC      | Normal PCR |
| RPE65_ex1    | 162  | GGCCCCTGGCTGAGAACTTCCT         | CTCTTCAGGAGCCCTTGAAATAGCACA     | Normal PCR |
| TULP1_ex1-4  | 1374 | AGGCTCCTAGACCTGCAGAGAAAAG      | GTGGGGGCTATTTGACTACAGTTG        | Normal PCR |
| EFEMP1_ex10  | 600  | GCCAAGAAGAGTTGAAACCAAGAA       | GGAAAGAATCCAAGTTTACCAGA         | Normal PCR |
| GUCA1A_ex3   | 712  | TTCTCTGGCATCTGTGAGTTTGAG       | TCTGTCTTGCCCTAGAAAGTGAGG        | Normal PCR |
| CDH23_ex3    | 486  | GCCTTGAGGCAGGATAGTGACTT        | AAACTAGTGCCAGAAGTGGGAGTG        | Normal PCR |
| CEP290_ex54  | 958  | TAAACAGGACAAAAAGGCATGGAT       | ACAAAACATACGGCTCAACCTCAT        | Normal PCR |
| CHM_ex14     | 428  | GTCCAAAGGAGCATGACTGGAGTA       | AAATATTTCCAACCACACCAACA         | Normal PCR |
| CNGB3_ex14   | 730  | GATAGACCAGCCTGCAAGGTTAAA       | TGAACTCTGAGAGCACGTTATTGC        | Normal PCR |
| IMPDH1_ex1-3 | 4918 | GGGAGAGACGAACCGAGTCTAGGCATCT   | GGGCTTAGGGGTAGCAGTCACAGAATAAT   | Normal PCR |
| PCDH15_ex7   | 1356 | GAAATACGGGCTTCTTCCCTTGACT      | CTTCAAACGGCCAAACATAATCTC        | Normal PCR |
| PCDH15_ex17  | 1004 | TCATTTGCTTTTCCCATCTGTTTT       | AAATTGTGCACATCTTCCCTCCAAT       | Normal PCR |
| PDE6B_ex4-6  | 1500 | CTCAAAGCGACAGATTCCACTTTC       | GTCTCACCCCAACTCCACTATG          | Normal PCR |
| RPE65_ex2    | 167  | CAACATGGGCTTCTTCCCTTATTCTTC    | GAGAGACTGACATAAAAGAGGATGG       | Normal PCR |
| TULP1_ex6-8  | 1265 | GAACTGCTTGTTAAGCTCCTGGTCTTTGTC | TTGCACAAATCTGGTTTCCCTTTGTCCTTAT | Normal PCR |
| BBS4_ex1     | 684  | GTCACTCGGCGATTTACTTCCCTT       | CCTGAATTCATCGGGTTCCCTCTAT       | Normal PCR |
| RPGRIP1_ex1  | 1127 | CAGAATAAGACCCTGCCAAAAGAA       | CAGCAAGATGTTCCACAGTGAGAG        | Normal PCR |
| RIMS1_ex23   | 357  | CCAAACATCTTCCCGAATAAATTG       | CACTTGTCTGTGAGGAGGAGTTGA        | Normal PCR |
| NYX_ex1      | 628  | TAAGCAACATTTGAGGACCATTCA       | TCGGCTCAGGAGTTTTGTTTTTAG        | Normal PCR |
| BBS9_ex2     | 324  | GAAATGTCCTTCTCAGATCTGTCCAAGTTT | CCCAAAAGAAGTCTGAGATTACAGCAGTCG  | Normal PCR |
| BBS9_ex22-23 | 1102 | ATACTGTTGCTGCTGTTGCCAAGTCATAAT | TAGCAAAGTCTTCAATTCCTTTCCTTCCCT  | Normal PCR |
| BBS4_ex2     | 269  | TGGATTAATTGCATAATTGGTGAGC      | CTGGGTGACAGTGAGACTCTGC          | Normal PCR |
| RPGRIP1_ex2  | 479  | TGGCCCAGAGTCATTTCTCATACT       | CATGGTGACGCATGCCTATAA           | Normal PCR |
| RIMS1_ex24   | 492  | CTCGTGTCTTCTATTGGGCAACTT       | CCGCCCTGAAATTATCCTTCTCTT        | Normal PCR |

|               |      |                                     |                                     |            |
|---------------|------|-------------------------------------|-------------------------------------|------------|
| CACNA1F_ex1   | 373  | GTGCAGATGGCCCTTCAATCT               | TCTGGCTGGTAGAGTTTGTGTTAGG           | Normal PCR |
| BBS9_ex5      | 230  | AGAATCGGAGTAGTGGATGAGAACAAATTA      | TGAAATAGCATACTCATGATTAAGCAAAA       | Normal PCR |
| ABCA4_ex1     | 570  | TCTTAACGGCGTTTATGTCCTTTG            | ATAAGGCCTCACTAAGCTGGGAAG            | Normal PCR |
| BBS4_ex7      | 203  | CAATCTCTAGATGTCTGTTGTTTCACT         | GCAATGTAACAACCTTCTGCAACA            | Normal PCR |
| RPGRIP1_ex5   | 571  | CCTGGCCCATTAATTCCTTTATGTT           | TACAGGCGTGATCCATGGTG                | Normal PCR |
| RIMS1_ex27    | 403  | AACATTTACGTTCCCCATTCTGTG            | ATCCTGCCTGGTACACACACTACA            | Normal PCR |
| KCNV2_ex2     | 489  | CATGACACAGGTCCTAGAGGGAGT            | GAATCTACCAGCCACATGTCCTAT            | Normal PCR |
| BBS9_ex6      | 1438 | TCACACTAGCAGGACATGAAAAGT            | AGCCATGATGATGTGTTGCTTAGA            | Normal PCR |
| USH2A_ex49    | 1116 | TGCAATACCTGTGTTGCCCTCTTTA           | AAATGAAATTTGCGATTGCGATCT            | Normal PCR |
| BBS4_ex8      | 208  | TCGTTCACTGGTAGTGATTTGG              | TCACTGTTTTAAAGGAAACAGATACA          | Normal PCR |
| RPGRIP1_ex23  | 564  | GCAAGGGAAAAGTGATTCAAGAGAA           | GAAAATGCTCAAGAGAGGTCCAAA            | Normal PCR |
| RIMS1_ex28    | 530  | TGGTGTGGGCTAAGTAGTCATTCA            | TGATGTTGGACTAAAGGAAGGGAAT           | Normal PCR |
| BBS2_ex1      | 891  | TTAATGACCTTCTGGAGTGGGGTA            | TCTGGGGTGGTATTACTGCTAA              | Normal PCR |
| BBS9_ex7      | 1071 | TGGTAGAGCTGTTTTCCCAACT              | TTTGCCTTGCTGTCTATGGAAGTT            | Normal PCR |
| BBS4_ex9      | 278  | AATCCCAAATTCCTTCAGGTAT              | CAGGAAAACCACATACACACAAA             | Normal PCR |
| RPGRIP1_ex24  | 1250 | TTGTGGGCTATTTTCCAACCTCACT           | GCAAAAATGGCCACTGTCTTCTTTT           | Normal PCR |
| RIMS1_ex29    | 512  | TACTTTGCAGGTGGTGGTGTGATA            | AACCAAATATGCCACAATTCCATC            | Normal PCR |
| BBS2_ex2      | 1309 | TAAGAGTGCTTTGACATCCTGCTG            | CTGTTTGCCCTAAGTTAGGAGGTT            | Normal PCR |
| BBS9_ex16     | 1003 | GAGCAAATCTTGCTTTCATGTTCCATAATCTG    | GACAGATATATCCAAAAACCTACCATAAAGATG   | Normal PCR |
| FBLN5_ex5     | 733  | AGCTGGGGACATTTCCCTTACTTC            | GGGTGGTTACACATGTGAGTTCAA            | Normal PCR |
| RIMS1_ex2     | 584  | TAATTGAGCTTTTGAAGCCTGAG             | TCCAGCTCATAACATTCCAAATC             | Normal PCR |
| MYO7A_ex2     | 657  | GAGAGAAGAATTCAGCTGCTCTGG            | GCCCTAAGAATAAGTTGGGCTCAG            | Normal PCR |
| BBS2_ex6-7    | 1093 | TTGCTCTAAAACACCAAACCTGT             | TCCAACACTGACAGACAAGAAAGC            | Normal PCR |
| BBS9_ex17     | 885  | TACTGGCTCGGTAATAGCTTCTTGCTATC       | CACTCAGCAAAAGCTATCCACTTTCCTGT       | Normal PCR |
| FBLN5_ex6     | 967  | GGAGATTGAGCCTTGATTCGAGA             | CCTTCAGATGAAAACCACAATAGG            | Normal PCR |
| RIMS1_ex12    | 360  | TCCAGTTGAAATAAGCATAATACTTCG         | TGCAAATACTAACAGCCTCCAACA            | Normal PCR |
| MYO7A_ex3     | 1215 | ATGATGATAAAAAATCAGCCCTGGA           | ACTTACACTTCTGGGGTCCCTTTC            | Normal PCR |
| BBS2_ex14-15  | 1300 | AATGCAGTTTGTAATTTCTTTGAGAGCTAAACT   | GCATACATATAACTAAGCTGTAACCTTCCCTAAGC | Normal PCR |
| BBS9_ex20     | 617  | AGTCAATAGATGGCAAAGCAGACTGAAC        | TGGTTTAAAGACAAGGAAAGCAGCATTTTT      | Normal PCR |
| FBLN5_ex11    | 454  | GGAAGTGACCTTTCAGATGAGACC            | TGTGTGCTCTCATTCTCTCTGTT             | Normal PCR |
| RIMS1_ex20-22 | 1357 | GCTTTATAGGCCTCCTACTTTCTGA           | TACCCTTGGGTTTATCCACATACG            | Normal PCR |
| MYO7A_ex38    | 545  | CTGAGAAAAGAAAGGCCAGTGAC             | CCAAATGACAGGGTCAGAGAAAAC            | Normal PCR |
| BBS2_ex16-17  | 1358 | TGAAAATATAGCTTAAAAATGGTGTCTTTTCTTTG | GGACTCTGAAGCCCTAATACTTCAAAAAGCA     | Normal PCR |
| BBS9_ex21     | 1047 | CTTTACCCACCAGATCATTAAACAGACGTG      | CTCATCTTTCCTTTGTCTCTTCCCCCTTA       | Normal PCR |
| MERTK_ex1     | 1445 | TTTCTCTTACGACTCACTCTCTGCTACTGC      | ACCATGCAACTCTAGTGGAAGTTCTCGT        | GC-PCR     |
| NYX_ex2       | 2079 | CTGATTAAGGTAACCGGAAAGCAAAGGAG       | TGTGGTAGAAAACAAAGGACTTCGGTGTA       | GC-PCR     |
| FSCN2_ex4-6   | 1020 | CTGCTGTCTGAGGAGACCTTTT              | CGGGAGAGACACGGTTTTAATG              | GC-PCR     |
| FZD4_ex1      | 396  | CTGCTACCCCGATGCTG                   | GGATGATCAACTTGGCATGG                | GC-PCR     |
| CA4_ex1       | 627  | CCCGGCTCAGAGGACTCTT                 | TGGCGTGATCTCACTGCAAC                | GC-PCR     |
| MASS1_ex1     | 277  | AAGGAGTACGGACGGGAGTCAG              | GCAGCTATGCCCCATTACCC                | GC-PCR     |

|               |      |                                |                                |        |
|---------------|------|--------------------------------|--------------------------------|--------|
| CA7_ex1-2     | 3687 | TTTTGGACACTTGATGGTCAGTGTAGTTTG | GGTTATTGAGAAGAATAAATGAGCGGCTTG | GC-PCR |
| GNAT1_ex1-8   | 4023 | TGAGCTTACAACAAGATAAGGAGTGGTGCT | CAAAATAAATGGGTTTAGGCATTGTGTGTG | GC-PCR |
| RP1_ex2-3     | 1922 | TCTAGGCCCTTATTCGTGTGTTTAGGTTGT | CCGCAACTACCAGAGAAGAGACTTACACAG | GC-PCR |
| PDE6B_ex13-19 | 4349 | CAAATGTCCATGCCTAAAACCAACATCTTA | AGACGTGCTCTGGAGCTGTTTCTAGTGTC  | GC-PCR |
| NRL_ex2-3     | 2234 | CTTTGAGGGAAGAGGGACTTGGTGAAGAG  | GGAAAAAGCATCTCGGATAGAGGTCCTAAT | GC-PCR |
| GRM6_ex1      | 1430 | GTCTCTCATCCCTCCCTAGAATCC       | AAGACCAGACCTTTCAGGCCTATC       | GC-PCR |
| GUCY2D_ex2-3  | 2100 | ACTTAGCTGGCAGAACTGGAAACAGAAGAT | GCCTACTCTCTAGAGGCAATCCTCGTACAC | GC-PCR |
| TIMP3_ex1     | 511  | TCCTCCAGCTCCTGCTCCTT           | CAAGGACATCGAGTTTCTCCACTC       | GC-PCR |
| USH2A_ex71-72 | 3839 | GGTGCTCATAGCTGCTAAATTCTGTAGGTG | AGAAATGAACAGCAGTGACATCCTTTCAAC | GC-PCR |

Note: For the amplicon's name, numbers after 'ex' are the exon numbers. PCR condition: LR-PCR, long range PCR; Normal PCR, short range PCR; GC-PCR, GC-rich PCR.
