# Supplementary material
Source: PubMed Central journal article supplement (PMC3231844)
Supplement: 11-7978_z7g999112202st2.pdf [file 11-7978_z7g999112202st2.pdf]

**Table S2.** Base call rates and accuracies of all individual samples with/without using user defined criteria.

| Sample ID | Without Filters |              | With Filters  |              |
|-----------|-----------------|--------------|---------------|--------------|
|           | Call Rate (%)   | Accuracy (%) | Call Rate (%) | Accuracy (%) |
| 1         | 89.39           | 99.84        | 96.50         | 99.93        |
| 2         | 83.86           | 99.76        | 92.52         | 99.89        |
| 3         | 87.63           | 99.79        | 95.81         | 99.91        |
| 4         | 88.79           | 99.71        | 96.54         | 99.87        |
| 5         | 84.18           | 99.72        | 93.01         | 99.82        |
| 6         | 83.30           | 99.61        | 92.86         | 99.88        |
| 7         | 86.39           | 99.70        | 94.92         | 99.86        |
| 8         | 86.47           | 99.81        | 94.27         | 99.89        |
| 9         | 82.31           | 99.53        | 93.76         | 99.86        |
| 10        | 84.74           | 99.66        | 94.98         | 99.90        |
| 11        | 83.92           | 99.77        | 92.40         | 99.87        |
| 12        | 80.12           | 99.74        | 89.14         | 99.85        |
| 13        | 81.20           | 99.67        | 89.96         | 99.82        |
| 14        | 75.55           | 99.62        | 84.27         | 99.76        |
| 15        | 83.91           | 99.73        | 92.24         | 99.86        |
| 16        | 88.94           | 99.67        | 96.46         | 99.82        |
| 17        | 85.39           | 99.79        | 93.50         | 99.87        |
| 18        | 83.54           | 99.76        | 92.27         | 99.86        |
| 19        | 88.32           | 99.72        | 96.02         | 99.89        |
| C1        | 88.65           | 99.71        | 96.15         | 99.89        |
| C2        | 85.33           | 99.49        | 95.65         | 99.81        |
| C3        | 88.61           | 99.80        | 95.82         | 99.91        |
| C4        | 79.72           | 99.30        | 92.89         | 99.70        |
| Average   | 84.79           | 99.69        | 93.56         | 99.86        |
| Minimum   | 75.55           | 99.30        | 84.27         | 99.70        |
| Maximum   | 89.39           | 99.84        | 96.54         | 99.93        |

Note: Without adopting user defined criteria, 267,550 bp (1508 exon fragments) per array were sequenced; with adopting user defined criteria, 181,897 bp (1050 exon fragments, ~70% of the tiled exon fragments) per array were efficiently sequenced. User defined criteria: filtering out fragments with consistently failed PCR assays at least for 8 samples; filtering out ones with a call rate of < 80% for at least for 4 samples. Sample #1-19, patient DNA; sample #C1-C4, CEPH control DNA.
