# Supplementary material
Source: PubMed Central journal article supplement (PMC3231844)
Supplement: 11-7978_z7g999112202st4.pdf [file 11-7978_z7g999112202st4.pdf]

**Table S4.** All of 123 variations validated by dideoxy sequencing.

| Gene     | Refseq ID      | Nucleotide change | Amino acid change | Genotype | Category             | SNP ID     | Reported Mut. | PolyPhen-2        | SIFT                 |
|----------|----------------|-------------------|-------------------|----------|----------------------|------------|---------------|-------------------|----------------------|
| ABCA4    | NM_000350.2    | c.4793C>A         | p.Ala1598Asp      | Hetero   | Coding nonsynonymous | rs61750155 | CM003386      | <b>Poss/0.638</b> | <b>Damaging/0.01</b> |
| ABCA4    | NM_000350.2    | c.6320G>A         | p.Arg2107His      | Hetero   | Coding nonsynonymous | rs62642564 | CM990074      | <b>Prob/0.996</b> | <b>Damaging/0.00</b> |
| ABCA4    | NM_000350.2    | c.3595C>T         | p.Gln1199Ter      | Hetero   | STOP                 |            |               |                   |                      |
| ABCA4    | NM_000350.2    | c.5882G>A         | p.Gly1961Glu      | Hetero   | Coding nonsynonymous | rs1800553  | CM970016      | <b>Prob/1.000</b> | <b>Damaging/0.00</b> |
| ABCA4    | NM_000350.2    | c.4297G>A         | p.Val1433Ile      | Hetero   | Coding nonsynonymous | rs56357060 | CM990050      | Benign/0.112      | Tolerated/0.09       |
| ABCA4    | NM_000350.2    | c.6730-3T>C       |                   | Hetero   | Intron               | rs1800717  |               |                   |                      |
| AIPL1    | NM_014336.3    | c.937G>T          | p.Ala313Ser       | Hetero   | Coding nonsynonymous |            |               | Benign/0.065      | <b>Damaging/0.05</b> |
| AIPL1    | NM_014336.3    | c.111C>T          | p.Phe37Phe        | Hetero   | Coding synonymous    | rs11650007 |               |                   |                      |
| AIPL1    | NM_014336.3    | c.111C>T          | p.Phe37Phe        | Hetero   | Coding synonymous    | rs11650007 |               |                   |                      |
| BBS1     | NM_024649      | c.316C>G          | p.Leu106Val       | Hetero   | Coding nonsynonymous |            |               | Benign/0.000      | Tolerated/1.00       |
| BBS12    | NM_001178007.1 | c.1381A>C         | p.Asn461His       | Hetero   | Coding nonsynonymous | rs10027479 |               | <b>Poss/0.706</b> | <b>Damaging/0.01</b> |
| BBS12    | NM_001178007.1 | c.1847G>A         | p.Ser616Asn       | Hetero   | Coding nonsynonymous | rs28507107 |               | Benign/0.113      | Tolerated/0.58       |
| BBS2     | NM_031885.3    | c.1511C>T         | p.Ala504Val       | Homo     | Coding nonsynonymous | rs16957538 |               | Benign/0.000      | Tolerated/0.29       |
| BBS2     | NM_031885.3    | c.1657+3A>G       |                   | Hetero   | Intron               | rs6499838  |               |                   |                      |
| BBS5     | NM_152384.2    | c.551A>G          | p.Asn184Ser       | Hetero   | Coding nonsynonymous |            | CM044580      | <b>Prob/0.986</b> | <b>Damaging/0.00</b> |
| BEST1    | NM_004183.3    | c.727G>A          | p.Ala243Thr       | Hetero   | Coding nonsynonymous |            | CM004434      | <b>Prob/0.946</b> | <b>Damaging/0.01</b> |
| BEST1    | NM_001139443.1 | c.1748C>T         | p.Ser583Leu       | Hetero   | Coding nonsynonymous |            |               | Benign/0.016      | Tolerated/0.21       |
| CA4      | NM_000717.3    | c.716G>A          | p.Arg239Gln       | Hetero   | Coding nonsynonymous |            |               | Benign/0.000      | Tolerated/0.59       |
| CA4      | NM_000717.3    | c.700G>A          | p.Val234Ile       | Hetero   | Coding nonsynonymous |            |               | Benign/0.097      | Tolerated/0.62       |
| CACNA1F  | NM_005183.2    | c.5789G>A         | p.Arg1930His      | Hetero   | Coding nonsynonymous | rs33910054 |               | Benign/0.000      | Tolerated/0.43       |
| CACNA1F  | NM_005183.2    | c.5789G>A         | p.Arg1930His      | Hetero   | Coding nonsynonymous | rs33910054 |               | Benign/0.000      | Tolerated/0.43       |
| CACNA1F  | NM_005183.2    | c.4161G>T         | p.Glu1387Asp      | Hemi     | Coding nonsynonymous |            |               | Benign/0.266      | <b>Damaging/0.00</b> |
| CACNA2D4 | NM_172364.4    | c.2517G>A         | p.Ala839Ala       | Hetero   | Coding synonymous    | rs33972365 |               |                   |                      |
| CACNA2D4 | NM_172364.4    | c.2517G>A         | p.Ala839Ala       | Hetero   | Coding synonymous    | rs33972365 |               |                   |                      |
| CACNA2D4 | NM_172364.4    | c.2065A>G         | p.Ile689Val       | Hetero   | Coding nonsynonymous |            |               | Benign/0.001      | Tolerated/0.1        |
| CDH23    | NM_022124.4    | c.4310G>A         | p.Arg1437Gln      | Hetero   | Coding nonsynonymous | rs56181447 |               | <b>Poss/0.711</b> | Tolerate/0.37        |
| CDH23    | NM_022124.4    | c.7C>T            | p.Arg3Cys         | Hetero   | Coding nonsynonymous | rs7902757  |               | Benign/0.106      | Tolerate/0.12        |
| CDH23    | NM_022124.4    | c.8411A>G         | p.Lys2804Arg      | Hetero   | Coding nonsynonymous |            |               | <b>Poss/0.730</b> | Tolerate/0.28        |
| CDH23    | NM_022124.4    | c.9373T>C         | p.Phe3125Leu      | Hetero   | Coding nonsynonymous | rs45583140 |               | Benign/0.023      | Tolerate/0.07        |

|        |                |            |              |        |                      |            |          |                   |                      |
|--------|----------------|------------|--------------|--------|----------------------|------------|----------|-------------------|----------------------|
| CDH23  | NM_022124.4    | c.9373T>C  | p.Phe3125Leu | Hetero | Coding nonsynonymous | rs45583140 |          | Benign/0.023      | Tolerate/0.07        |
| CDH23  | NM_022124.4    | c.3625A>G  | p.Thr1209Ala | Hetero | Coding nonsynonymous | rs41281314 | CM021540 | <b>Poss/0.742</b> | Tolerate/0.46        |
| CDH23  | NM_022124.4    | c.5023G>A  | p.Val1675Ile | Hetero | Coding nonsynonymous | rs17712523 |          | Benign/0.491      | Tolerate/0.39        |
| CDH23  | NM_022124.4    | c.5023G>A  | p.Val1675Ile | Hetero | Coding nonsynonymous | rs17712523 |          | Benign/0.491      | Tolerate/0.39        |
| CDH23  | NM_022124.4    | c.5023G>A  | p.Val1675Ile | Hetero | Coding nonsynonymous | rs17712523 |          | Benign/0.491      | Tolerate/0.39        |
| CDH23  | NM_022124.4    | c.5023G>A  | p.Val1675Ile | Hetero | Coding nonsynonymous | rs17712523 |          | Benign/0.491      | Tolerate/0.39        |
| CDH23  | NM_022124.4    | c.6847G>A  | p.Val2283Ile | Hetero | Coding nonsynonymous | rs41281334 |          | Benign/0.001      | Tolerate/0.45        |
| CDH3   | NM_001793.4    | c.1285G>A  | p.Val429Ile  | Hetero | Coding nonsynonymous | rs34394404 |          | Benign/0.163      | Tolerated/0.43       |
| CEP290 | NM_025114.3    | c.1991A>G  | p.Asp664Gly  | Hetero | Coding nonsynonymous |            |          | <b>Poss/0.754</b> | Tolerated/0.14       |
| CEP290 | NM_025114.3    | c.2827A>G  | p.Ile943Val  | Homo   | Coding nonsynonymous |            |          | Benign/0.000      | Tolerated/0.27       |
| CEP290 | NM_025114.3    | c.2512A>G  | p.Lys838Glu  | Homo   | Coding nonsynonymous | rs11104738 |          | Benign/0.000      | Tolerated/1.00       |
| CNGB1  | NM_001297.4    | c.2882C>T  | p.Ala961Val  | Hetero | Coding nonsynonymous |            |          | Benign/0.211      | Tolerated/0.22       |
| CNGB1  | NM_001297.4    | c.2747G>A  | p.Arg916His  | Hetero | Coding nonsynonymous |            |          | <b>Prob/0.994</b> | <b>Damaging/0.00</b> |
| CNGB1  | NM_001297.4    | c.2233C>A  | p.Leu745Ile  | Hetero | Coding nonsynonymous |            |          | Benign/0.165      | Tolerated/0.33       |
| CNGB1  | NM_001297.4    | c.1473G>A  | p.Pro491Pro  | Hetero | Coding synonymous    |            |          |                   |                      |
| CNGB1  | NM_001297.4    | c.1604T>C  | p.Val535Ala  | Hetero | Coding nonsynonymous |            |          | Benign/0.467      | Tolerated/0.15       |
| CNGB1  | NM_001297.4    | c.1604T>C  | p.Val535Ala  | Hetero | Coding nonsynonymous |            |          | Benign/0.467      | Tolerated/0.15       |
| CNGB3  | NM_019098.4    | c.384C>T   | p.Ala128Ala  | Hetero | Coding synonymous    |            |          |                   |                      |
| CNGB3  | NM_019098.4    | c.80A>G    | p.Asn27Ser   | Hetero | Coding nonsynonymous | rs35807406 |          | Benign/0.025      | Tolerated/0.41       |
| CRB1   | NM_201253.2    | c.99G>T    | p.Arg33Ser   | Hetero | Coding nonsynonymous |            |          | Benign/0.090      | Tolerated/0.56       |
| CYP4V2 | NM_207352.3    | c.1114G>A  | p.Val372Ile  | Hetero | Coding nonsynonymous | rs61755911 |          | Benign/0.004      | Tolerated/0.24       |
| FSCN2  | NM_001077182.2 | c.49G>A    | p.Val17Ile   | Hetero | Coding nonsynonymous |            |          | Benign/0.001      | Tolerated/1.00       |
| GPR98  | NM_032119.3    | c.18273A>G | p.Ala6091Ala | Hetero | Coding synonymous    |            |          |                   |                      |
| GPR98  | NM_032119.3    | c.10872A>G | p.Gln3624Gln | Hetero | Coding synonymous    |            |          |                   |                      |
| GPR98  | NM_032119.3    | c.10872A>G | p.Gln3624Gln | Hetero | Coding synonymous    |            |          |                   |                      |
| GPR98  | NM_032119.3    | c.10577T>C | p.Met3526Thr | Hetero | Coding nonsynonymous |            |          | Benign/0.001      | Tolerated/0.59       |
| GPR98  | NM_032119.3    | c.10577T>C | p.Met3526Thr | Homo   | Coding nonsynonymous |            |          | Benign/0.001      | Tolerated/0.59       |
| GPR98  | NM_032119.3    | c.10577T>C | p.Met3526Thr | Hetero | Coding nonsynonymous |            |          | Benign/0.001      | Tolerated/0.59       |
| GPR98  | NM_032119.3    | c.4506C>T  | p.Pro1502Pro | Hetero | Coding synonymous    |            |          |                   |                      |
| GPR98  | NM_032119.3    | c.4506C>T  | p.Pro1502Pro | Hetero | Coding synonymous    |            |          |                   |                      |
| GPR98  | NM_032119.3    | c.4506C>T  | p.Pro1502Pro | Hetero | Coding synonymous    |            |          |                   |                      |
| GPR98  | NM_032119.3    | c.5780C>T  | p.Thr1927Met | Hetero | Coding nonsynonymous |            |          | Benign/0.024      | Tolerated/0.08       |

|        |                |              |              |        |                        |            |          |                   |                      |
|--------|----------------|--------------|--------------|--------|------------------------|------------|----------|-------------------|----------------------|
| GPR98  | NM_032119.3    | c.5780C>T    | p.Thr1927Met | Hetero | Coding nonsynonymous   |            |          | Benign/0.024      | Tolerated/0.08       |
| GPR98  | NM_032119.3    | c.16308C>A   | p.Thr5436Thr | Hetero | Coding synonymous      |            |          |                   |                      |
| GPR98  | NM_032119.3    | c.5525-7C>T  |              | Hetero | Intron                 |            |          |                   |                      |
| GRK1   | NM_002929.2    | c.693C>T     | p.Gly231Gly  | Hetero | Coding synonymous      | rs62621170 |          |                   |                      |
| GRM6   | NM_000843.3    | c.2420C>T    | p.Ala807Val  | Hetero | Coding nonsynonymous   | rs17078874 |          | <b>Poss/0.505</b> | Tolerated/0.19       |
| GUCA1B | NM_002098.5    | c.253G>A     | p.Val85Met   | Hetero | Coding nonsynonymous   |            | CM045052 | Benign/0.023      | <b>Damaging/0.02</b> |
| GUCY2D | NM_000180.3    | c.1720C>T    | p.Arg574Cys  | Hetero | Coding nonsynonymous   |            |          | <b>Prob/0.933</b> | <b>Damaging/0.02</b> |
| HMCN1  | NM_031935.2    | c.14158G>A   | p.Ala4720Thr | Hetero | Coding nonsynonymous   | rs6693069  |          | Benign/0.002      | Tolerated/0.69       |
| HMCN1  | NM_031935.2    | c.6917G>A    | p.Arg2306Gln | Hetero | Coding nonsynonymous   |            |          | Benign/0.021      | Tolerated/0.54       |
| HMCN1  | NM_031935.2    | c.4586A>G    | p.Asn1529Ser | Hetero | Coding nonsynonymous   | rs41317471 |          | <b>Poss/0.586</b> | Tolerated/0.16       |
| HMCN1  | NM_031935.2    | c.5482A>G    | p.Ile1828Val | Hetero | Coding nonsynonymous   |            |          | <b>Prob/0.896</b> | Tolerated/0.4        |
| HMCN1  | NM_031935.2    | c.9397A>G    | p.Ile3133Val | Hetero | Coding nonsynonymous   |            |          | Benign/0.118      | Tolerated/0.29       |
| HMCN1  | NM_031935.2    | c.13313-4G>A |              | Hetero | Intron                 | rs41317497 |          |                   |                      |
| HTRA1  | NM_002775.4    | c.753C>T     | p.Ile251Ile  | Hetero | Coding synonymous      |            |          |                   |                      |
| KCNV2  | NM_133497.2    | c.-2C>T      |              | Hetero | 5' untranslated region | rs75316505 |          |                   |                      |
| LRAT   | NM_004744.3    | c.74T>A      | p.Phe25Tyr   | Hetero | Coding nonsynonymous   | rs75368761 |          | <b>Prob/0.98</b>  | Tolerated/0.11       |
| LRP5   | NM_002335.2    | c.1999G>A    | p.Val667Met  | Hetero | Coding nonsynonymous   | rs4988321  | CM014727 | <b>Prob/0.957</b> | Tolerated/0.07       |
| LRP5   | NM_002335.2    | c.1999G>A    | p.Val667Met  | Hetero | Coding nonsynonymous   | rs4988321  | CM014727 | <b>Prob/0.957</b> | Tolerated/0.07       |
| LRP5   | NM_002335.2    | c.1999G>A    | p.Val667Met  | Hetero | Coding nonsynonymous   | rs4988321  | CM014727 | <b>Prob/0.957</b> | Tolerated/0.07       |
| MERTK  | NM_006343.2    | c.60A>T      | p.Arg20Ser   | Hetero | Coding nonsynonymous   | rs35898499 |          | Benign/0.018      | Tolerated/0.15       |
| MERTK  | NM_006343.2    | c.878G>A     | p.Arg293His  | Hetero | Coding nonsynonymous   | rs34072093 |          | Benign/0.002      | Tolerated/0.62       |
| MERTK  | NM_006343.2    | c.878G>A     | p.Arg293His  | Hetero | Coding nonsynonymous   | rs34072093 |          | Benign/0.002      | Tolerated/0.62       |
| MERTK  | NM_006343.2    | c.2608G>A    | p.Val870Ile  | Hetero | Coding nonsynonymous   | rs2230517  |          | Benign/0.008      | Tolerated/0.74       |
| MKKS   | NM_018848.2    | c.1015A>G    | p.Ile339Val  | Hetero | Coding nonsynonymous   |            | CM021299 | Benign/0.004      | Tolerated/0.13       |
| MKKS   | NM_018848.2    | c.1015A>G    | p.Ile339Val  | Hetero | Coding nonsynonymous   |            | CM021299 | Benign/0.004      | Tolerated/0.13       |
| PCDH15 | NM_001142763.1 | c.1153G>A    | p.Gly385Ser  | Hetero | Coding nonsynonymous   | rs10825269 |          | Benign/0.002      | Tolerated/1.00       |
| PCDH15 | NM_001142763.1 | c.1153G>A    | p.Gly385Ser  | Homo   | Coding nonsynonymous   | rs10825269 |          | Benign/0.002      | Tolerated/1.00       |
| PCDH15 | NM_001142763.1 | c.1278T>C    | p.Thr426Thr  | Hetero | Coding synonymous      | rs7921598  |          |                   |                      |
| PCDH15 | NM_001142763.1 | c.1278T>C    | p.Thr426Thr  | Hetero | Coding synonymous      | rs7921598  |          |                   |                      |
| PCDH15 | NM_001142763.1 | c.1278T>C    | p.Thr426Thr  | Homo   | Coding synonymous      | rs7921598  |          |                   |                      |
| PDE6A  | NM_000440.2    | c.1546C>G    | p.Leu516Val  | Hetero | Coding nonsynonymous   | rs6173362  |          | Benign/0.016      | Tolerated/0.52       |
| PDE6A  | NM_000440.2    | c.879G>A     | p.Pro293Pro  | Hetero | Coding synonymous      |            |          |                   |                      |

|         |                |              |              |        |                      |                    |                   |                      |
|---------|----------------|--------------|--------------|--------|----------------------|--------------------|-------------------|----------------------|
| PDE6B   | NM_001145291.1 | c.143G>A     | p.Arg48Gln   | Hetero | Coding nonsynonymous |                    | Benign/0.004      | Tolerated/0.51       |
| PDE6B   | NM_001145291.1 | c.143G>A     | p.Arg48Gln   | Hetero | Coding nonsynonymous |                    | Benign/0.004      | Tolerated/0.51       |
| PROM1   | NM_006017.2    | c.1557C>A    | p.Tyr519Ter  | Hetero | STOP                 |                    |                   |                      |
| PROM1   | NM_006017.2    | c.1768-5C>T  |              | Hetero | Intron               | rs55708318         |                   |                      |
| PRPH2   | NM_003926.5    | c.933C>T     | p.Ser311Ser  | Hetero | Coding synonymous    |                    |                   |                      |
| RGR     | NM_002921.3    | c.734C>T     | p.Ser245Phe  | Hetero | Coding nonsynonymous | rs1730895          | Benign/0.001      | Tolerated/0.33       |
| RP1     | NM_006269.1    | c.6055G>A    | p.Gly2019Ser | Hetero | Coding nonsynonymous |                    | Benign/0.001      | Tolerated/0.45       |
| RP1     | NM_006269.1    | c.2255C>T    | p.Thr752Met  | Hetero | Coding nonsynonymous |                    | Benign/0.025      | Tolerated/0.49       |
| RPGR    | NM_001034853.1 | c.1274G>A    | p.Arg425Lys  | Hetero | Coding nonsynonymous | rs1801687          | Benign/0.083      | Tolerated/0.31       |
| RPGR    | NM_001034853.1 | c.223A>G     | p.Ile75Val   | Hetero | Coding nonsynonymous | CM011007           | Benign/0.015      | Tolerated/1.00       |
| RPGRIP1 | NM_020366.3    | c.3358A>G    | p.Ile1120Val | Hetero | Coding nonsynonymous | CM076486           | <b>Poss/0.833</b> | Tolerated/0.09       |
| TLR4    | NM_138554.3    | c.842G>A     | p.Cys281Tyr  | Hetero | Coding nonsynonymous | CM035921           | <b>Poss/0.900</b> | Tolerated/0.25       |
| TLR4    | NM_138554.3    | c.1196C>T    | p.Thr399Ile  | Hetero | Coding nonsynonymous | rs4986791 CM001362 | Benign/0.013      | Tolerated/0.19       |
| TRIM32  | NM_012210.3    | c.1222C>T    | p.Arg408Cys  | Hetero | Coding nonsynonymous | rs3747835          | <b>Poss/0.795</b> | <b>Damaging/0.04</b> |
| TTC8    | NM_198310.2    | c.505-5C>T   |              | Hetero | Intron               |                    |                   |                      |
| USH2A   | NM_206933.2    | c.6875G>A    | p.Arg2292His | Hetero | Coding nonsynonymous |                    | Benign/0.001      | Tolerated/0.58       |
| USH2A   | NM_206933.2    | c.15091C>T   | p.Arg5031Trp | Hetero | Coding nonsynonymous |                    | Benign/0.058      | Tolerated/0.19       |
| USH2A   | NM_206933.2    | c.1931A>T    | p.Asp644Val  | Hetero | Coding nonsynonymous | rs1805048          | Benign/0.077      | Tolerated/0.44       |
| USH2A   | NM_206933.2    | c.6713A>C    | p.Glu2238Ala | Hetero | Coding nonsynonymous | UMD-USH2A          | <b>Prob/0.995</b> | <b>Damaging/0.02</b> |
| USH2A   | NM_206933.2    | c.6713A>C    | p.Glu2238Ala | Hetero | Coding nonsynonymous | UMD-USH2A          | <b>Prob/0.995</b> | <b>Damaging/0.02</b> |
| USH2A   | NM_206933.2    | c.6713A>C    | p.Glu2238Ala | Hetero | Coding nonsynonymous | UMD-USH2A          | <b>Prob/0.995</b> | <b>Damaging/0.02</b> |
| USH2A   | NM_206933.2    | c.2137G>C    | p.Gly713Arg  | Hetero | Coding nonsynonymous | rs696723 CM001809  | <b>Prob/1.000</b> | <b>Damaging/0.01</b> |
| USH2A   | NM_206933.2    | c.2137G>C    | p.Gly713Arg  | Hetero | Coding nonsynonymous | rs696723 CM001809  | <b>Prob/1.000</b> | <b>Damaging/0.01</b> |
| USH2A   | NM_206933.2    | c.4714C>T    | p.Leu1572Phe | Hetero | Coding nonsynonymous |                    | <b>Poss/0.673</b> | <b>Damaging/0.01</b> |
| USH2A   | NM_206933.2    | c.7584C>T    | p.Thr2528Thr | Hetero | Coding synonymous    |                    |                   |                      |
| USH2A   | NM_206933.2    | c.9343A>G    | p.Thr3115Ala | Hetero | Coding nonsynonymous |                    | Benign/0.002      | Tolerated/1.00       |
| USH2A   | NM_206933.2    | c.13297G>T   | p.Val4433Leu | Hetero | Coding nonsynonymous | UMD-USH2A          | Benign/0.000      | Tolerated/0.36       |
| USH2A   | NM_206933.2    | c.13297G>T   | p.Val4433Leu | Hetero | Coding nonsynonymous | UMD-USH2A          | Benign/0.000      | Tolerated/0.36       |
| USH2A   | NM_206933.2    | c.14792-2A>G |              | Hetero | Intron               |                    |                   |                      |
| USH3A   | NM_017926.2    | c.6A>C       | p.Pro2Pro    | Hetero | Coding synonymous    |                    |                   |                      |

Note: Under the reported mutations, either the HGMD accession number or UMD-USH2A mutation database was cited. PolyPhen-2 or SIFT scores in bold represent the probable/possible damaging effect (PolyPhen-2) or damaging effect (SIFT). Hetero, heterozygous; homo, homozygous; hemi, hemizygous.
